# Supplementary material for: The neurophysiologic landscape of the sleep onset: a systematic review
Source: PubMed Central journal article supplement — J Thorac Dis. 2023 Aug 14;15(8):4530–43. doi: 10.21037/jtd-23-325 (PMC10482638; doi:10.21037/jtd-23-325), 2023-08-14
Supplement: jtd-15-08-4530-supplementary.pdf [file jtd-15-08-4530-supplementary.pdf]

| Table S1 The sleep-onset process    |                                                                                                                                                                                                                                                                                                                                                                                                                                                                                                                                                                                                                                                                                                                                                                                                                                                                                                                                                                                                                                                                                                                                                                                                                                                                                                                                                                                                                                                                                                                                                                                                                                                                                                                                                                                                                                                                                                                                                                                                                                                                                                                                                                                                                                                                                  |                                                                                                                                                                                                                                                                                                                                                                                                                                                                                                                                                                                                                                                                      |
|-------------------------------------|----------------------------------------------------------------------------------------------------------------------------------------------------------------------------------------------------------------------------------------------------------------------------------------------------------------------------------------------------------------------------------------------------------------------------------------------------------------------------------------------------------------------------------------------------------------------------------------------------------------------------------------------------------------------------------------------------------------------------------------------------------------------------------------------------------------------------------------------------------------------------------------------------------------------------------------------------------------------------------------------------------------------------------------------------------------------------------------------------------------------------------------------------------------------------------------------------------------------------------------------------------------------------------------------------------------------------------------------------------------------------------------------------------------------------------------------------------------------------------------------------------------------------------------------------------------------------------------------------------------------------------------------------------------------------------------------------------------------------------------------------------------------------------------------------------------------------------------------------------------------------------------------------------------------------------------------------------------------------------------------------------------------------------------------------------------------------------------------------------------------------------------------------------------------------------------------------------------------------------------------------------------------------------|----------------------------------------------------------------------------------------------------------------------------------------------------------------------------------------------------------------------------------------------------------------------------------------------------------------------------------------------------------------------------------------------------------------------------------------------------------------------------------------------------------------------------------------------------------------------------------------------------------------------------------------------------------------------|
| Method of study                     | Main findings                                                                                                                                                                                                                                                                                                                                                                                                                                                                                                                                                                                                                                                                                                                                                                                                                                                                                                                                                                                                                                                                                                                                                                                                                                                                                                                                                                                                                                                                                                                                                                                                                                                                                                                                                                                                                                                                                                                                                                                                                                                                                                                                                                                                                                                                    | Evaluation                                                                                                                                                                                                                                                                                                                                                                                                                                                                                                                                                                                                                                                           |
| Electroencephalogram (EEG)          |                                                                                                                                                                                                                                                                                                                                                                                                                                                                                                                                                                                                                                                                                                                                                                                                                                                                                                                                                                                                                                                                                                                                                                                                                                                                                                                                                                                                                                                                                                                                                                                                                                                                                                                                                                                                                                                                                                                                                                                                                                                                                                                                                                                                                                                                                  |                                                                                                                                                                                                                                                                                                                                                                                                                                                                                                                                                                                                                                                                      |
| Spectral power                      |                                                                                                                                                                                                                                                                                                                                                                                                                                                                                                                                                                                                                                                                                                                                                                                                                                                                                                                                                                                                                                                                                                                                                                                                                                                                                                                                                                                                                                                                                                                                                                                                                                                                                                                                                                                                                                                                                                                                                                                                                                                                                                                                                                                                                                                                                  |                                                                                                                                                                                                                                                                                                                                                                                                                                                                                                                                                                                                                                                                      |
| Delta <4 Hz                         | <ul style="list-style-type: none"><li>Earlier synchronisation and generalized increase, predominated over frontomedial regions [De Gennaro <i>et al.</i>, 2001a (44); 2001b (45); Hori, 1985 (46); Marzano <i>et al.</i>, 2013 (47); Ogilvie <i>et al.</i>, 1991 (52); Park <i>et al.</i>, 2015 (48); Siclari <i>et al.</i>, 2014 (49); Tanaka <i>et al.</i>, 1997 (50); Tanaka <i>et al.</i>, 2000 (51)]</li><li>Global increase of the post compared with pre-SO ratio following SD [Gorgoni <i>et al.</i>, 2019 (117)]</li><li>Generalised reduction of delta power and its ratio to beta in both pre-SO and post-SO intervals compared with young adults [Gorgoni <i>et al.</i>, 2021 (118)]</li><li>The incidence of frontal-intermittent-rhythmic delta activity at SO in older adults with no association with impaired cognitive performance [Kawai <i>et al.</i>, 2016 (119)]</li></ul>                                                                                                                                                                                                                                                                                                                                                                                                                                                                                                                                                                                                                                                                                                                                                                                                                                                                                                                                                                                                                                                                                                                                                                                                                                                                                                                                                                                 | <p>Strengths:</p> <ul style="list-style-type: none"><li>Non-invasive</li><li>High temporal resolution</li><li>Effectively summarises immense amount of information obtained by EEG techniques and allows for identification of important spatio-temporal organisations of primary EEG frequencies with moment by moment precision</li><li>Comparisons can be made between a resting brain and when presented with a task or stimulus, to examine activity in the brain</li><li>Allows for the diagnosis of sleep pathologies</li><li>Spectra are estimated using several time samples (i.e., features estimated from signal power spectra robust to noise)</li></ul> |
| Theta 5–7 Hz                        | <ul style="list-style-type: none"><li>Global increase with an occipital peak replacing the prevalence of alpha oscillations [Hori, 1985 (46); Marzano <i>et al.</i>, 2013 (47); Park <i>et al.</i>, 2015 (48); Siclari <i>et al.</i>, 2014 (49); Tanaka <i>et al.</i>, 1997 (50); Wright <i>et al.</i>, 1995 (38)]</li><li>Global increase of the post compared with pre-SO ratio following SD [Gorgoni <i>et al.</i>, 2019 (117)]</li></ul>                                                                                                                                                                                                                                                                                                                                                                                                                                                                                                                                                                                                                                                                                                                                                                                                                                                                                                                                                                                                                                                                                                                                                                                                                                                                                                                                                                                                                                                                                                                                                                                                                                                                                                                                                                                                                                     |                                                                                                                                                                                                                                                                                                                                                                                                                                                                                                                                                                                                                                                                      |
| Alpha 8–12 Hz                       | <ul style="list-style-type: none"><li>Gradual pre-SO decrease of the occipital alpha, followed by a post-SO increase of frontocentral dominance of alpha [De Gennaro <i>et al.</i>, 2001a (44); Hasan and Broughton, 1994 (59); Hori, 1985 (46); Marzano <i>et al.</i>, 2013 (47); Park <i>et al.</i>, 2015 (48); Tanaka <i>et al.</i>, 1997 (50)]</li><li>Increased alpha power at SO [Ogilvie <i>et al.</i>, 1991 (52)]</li><li>Increased post compared with pre-SO ratio with frontocentral dominance following SD [Gorgoni <i>et al.</i>, 2019 (117)]</li></ul>                                                                                                                                                                                                                                                                                                                                                                                                                                                                                                                                                                                                                                                                                                                                                                                                                                                                                                                                                                                                                                                                                                                                                                                                                                                                                                                                                                                                                                                                                                                                                                                                                                                                                                              |                                                                                                                                                                                                                                                                                                                                                                                                                                                                                                                                                                                                                                                                      |
| Sigma 12–15 Hz                      | <ul style="list-style-type: none"><li>Post-SO increase with a centro-parietal predominance [De Gennaro <i>et al.</i>, 2001a (44), 2001; Hori, 1985 (46); Marzano <i>et al.</i>, 2013 (47); Siclari <i>et al.</i>, 2014 (49); Tanaka <i>et al.</i>, 1997 (50)]</li><li>Absence of quantitative differences following SD [Gorgoni <i>et al.</i>, 2019 (117)]</li></ul>                                                                                                                                                                                                                                                                                                                                                                                                                                                                                                                                                                                                                                                                                                                                                                                                                                                                                                                                                                                                                                                                                                                                                                                                                                                                                                                                                                                                                                                                                                                                                                                                                                                                                                                                                                                                                                                                                                             | <p>Limitations:</p> <ul style="list-style-type: none"><li>Low spatial resolution</li><li>Labour-intensive</li><li>The presence of various EEG oscillatory activities cannot provide a definitive account as other biomarkers such as hormone secretion, metabolic activation, and variability in heart rate and sympathetic nervous system activation could also play a part</li></ul>                                                                                                                                                                                                                                                                               |
| Beta 16–24 Hz                       | <ul style="list-style-type: none"><li>Widespread decrease of the beta and gamma activity [De Gennaro <i>et al.</i>, 2001a (44), 2001b (45); Marzano <i>et al.</i>, 2013 (47); Park <i>et al.</i>, 2015 (48); Siclari <i>et al.</i>, 2014 (49)]</li></ul>                                                                                                                                                                                                                                                                                                                                                                                                                                                                                                                                                                                                                                                                                                                                                                                                                                                                                                                                                                                                                                                                                                                                                                                                                                                                                                                                                                                                                                                                                                                                                                                                                                                                                                                                                                                                                                                                                                                                                                                                                         |                                                                                                                                                                                                                                                                                                                                                                                                                                                                                                                                                                                                                                                                      |
| Gamma 25–40 Hz                      | <ul style="list-style-type: none"><li>A generalised reduction of delta/beta ratio pre and post SO in older adults compared to younger adults [Gorgoni <i>et al.</i>, 2021 (118)]</li><li>No significant change in beta activity [Hori, 1985 (46)]</li><li>Significant decreases in beta power at pre-SO, with this trend sharply (and significantly) reversed at SO [Ogilvie <i>et al.</i>, 1991 (52)]</li><li>Absence of quantitative differences in the beta bands following SD [Gorgoni <i>et al.</i>, 2019 (117)]</li></ul>                                                                                                                                                                                                                                                                                                                                                                                                                                                                                                                                                                                                                                                                                                                                                                                                                                                                                                                                                                                                                                                                                                                                                                                                                                                                                                                                                                                                                                                                                                                                                                                                                                                                                                                                                  | <ul style="list-style-type: none"><li>Fails to capture micro-oscillations</li><li>vulnerability to estimation bias when the data length is short</li><li>Removes all temporal dynamics of SOP</li></ul>                                                                                                                                                                                                                                                                                                                                                                                                                                                              |
| Oscillatory activity                |                                                                                                                                                                                                                                                                                                                                                                                                                                                                                                                                                                                                                                                                                                                                                                                                                                                                                                                                                                                                                                                                                                                                                                                                                                                                                                                                                                                                                                                                                                                                                                                                                                                                                                                                                                                                                                                                                                                                                                                                                                                                                                                                                                                                                                                                                  |                                                                                                                                                                                                                                                                                                                                                                                                                                                                                                                                                                                                                                                                      |
| Delta <4 Hz                         | Global increase and frontalization of slow-wave activity (SWA) [Marzano <i>et al.</i> , 2013 (47)]                                                                                                                                                                                                                                                                                                                                                                                                                                                                                                                                                                                                                                                                                                                                                                                                                                                                                                                                                                                                                                                                                                                                                                                                                                                                                                                                                                                                                                                                                                                                                                                                                                                                                                                                                                                                                                                                                                                                                                                                                                                                                                                                                                               |                                                                                                                                                                                                                                                                                                                                                                                                                                                                                                                                                                                                                                                                      |
| Theta 5–7 Hz                        | <ul style="list-style-type: none"><li>Maximum delta/theta (1.5–7 Hz) events ratio immediately following SO while the event frequency decreases from NREM-I onwards, further into NREM-II [Marzano <i>et al.</i>, 2013 (47); Achermann <i>et al.</i>, 2019 (58)]</li><li>Post-SO frontocentral increase in the oscillatory peak following SO [Gorgoni <i>et al.</i>, 2019 (117)]</li></ul>                                                                                                                                                                                                                                                                                                                                                                                                                                                                                                                                                                                                                                                                                                                                                                                                                                                                                                                                                                                                                                                                                                                                                                                                                                                                                                                                                                                                                                                                                                                                                                                                                                                                                                                                                                                                                                                                                        |                                                                                                                                                                                                                                                                                                                                                                                                                                                                                                                                                                                                                                                                      |
| Alpha 8–12 Hz                       | <ul style="list-style-type: none"><li>Transition from a posterior to an anterior predominance [Marzano <i>et al.</i>, 2013 (47); Achermann <i>et al.</i>, 2019 (58)]</li><li>Post-SO increase in the oscillatory peak following SD [Gorgoni <i>et al.</i>, 2019 (117)]</li></ul>                                                                                                                                                                                                                                                                                                                                                                                                                                                                                                                                                                                                                                                                                                                                                                                                                                                                                                                                                                                                                                                                                                                                                                                                                                                                                                                                                                                                                                                                                                                                                                                                                                                                                                                                                                                                                                                                                                                                                                                                 |                                                                                                                                                                                                                                                                                                                                                                                                                                                                                                                                                                                                                                                                      |
| Sigma 12–15 Hz                      | <ul style="list-style-type: none"><li>Global and progressive increase following SO with a central maximum [Marzano <i>et al.</i>, 2013 (47); Achermann <i>et al.</i>, 2019 (58)]</li><li>Decreased global frequency with an antero- posterior gradient [Marzano <i>et al.</i>, 2013 (47); Achermann <i>et al.</i>, 2019 (58)]</li><li>Decreased sigma oscillatory events following SD [Achermann <i>et al.</i>, 2019 (58)]</li></ul>                                                                                                                                                                                                                                                                                                                                                                                                                                                                                                                                                                                                                                                                                                                                                                                                                                                                                                                                                                                                                                                                                                                                                                                                                                                                                                                                                                                                                                                                                                                                                                                                                                                                                                                                                                                                                                             |                                                                                                                                                                                                                                                                                                                                                                                                                                                                                                                                                                                                                                                                      |
| Beta 16–24 Hz                       | <ul style="list-style-type: none"><li>Gradual reduction in the beta power with a maximum in temporo-frontal areas [Marzano <i>et al.</i>, 2013 (47)]</li></ul>                                                                                                                                                                                                                                                                                                                                                                                                                                                                                                                                                                                                                                                                                                                                                                                                                                                                                                                                                                                                                                                                                                                                                                                                                                                                                                                                                                                                                                                                                                                                                                                                                                                                                                                                                                                                                                                                                                                                                                                                                                                                                                                   |                                                                                                                                                                                                                                                                                                                                                                                                                                                                                                                                                                                                                                                                      |
| Gamma 25–40 Hz                      | <ul style="list-style-type: none"><li>Post-SO centro-parietal increase in the beta frequency peak following SD [Gorgoni <i>et al.</i>, 2019 (117)]</li><li>Post-SO decline in the beta oscillatory peak in the lateral frontal regions and right occipital area [Marzano <i>et al.</i>, 2013 (47)]</li><li>Gamma activity not assessed</li></ul>                                                                                                                                                                                                                                                                                                                                                                                                                                                                                                                                                                                                                                                                                                                                                                                                                                                                                                                                                                                                                                                                                                                                                                                                                                                                                                                                                                                                                                                                                                                                                                                                                                                                                                                                                                                                                                                                                                                                 |                                                                                                                                                                                                                                                                                                                                                                                                                                                                                                                                                                                                                                                                      |
| Cortical source                     |                                                                                                                                                                                                                                                                                                                                                                                                                                                                                                                                                                                                                                                                                                                                                                                                                                                                                                                                                                                                                                                                                                                                                                                                                                                                                                                                                                                                                                                                                                                                                                                                                                                                                                                                                                                                                                                                                                                                                                                                                                                                                                                                                                                                                                                                                  |                                                                                                                                                                                                                                                                                                                                                                                                                                                                                                                                                                                                                                                                      |
| Delta <4 Hz                         | <ul style="list-style-type: none"><li>Progressive increase of the delta activity post-SO, most salient in the PFC and postcentral gyrus [Park <i>et al.</i>, 2015 (48); Fernandez Guerrero and Achermann, 2019 (53)]</li><li>Greater involvement of the frontal cortex following SD [Fernandez Guerrero and Achermann, 2019 (53)]</li></ul>                                                                                                                                                                                                                                                                                                                                                                                                                                                                                                                                                                                                                                                                                                                                                                                                                                                                                                                                                                                                                                                                                                                                                                                                                                                                                                                                                                                                                                                                                                                                                                                                                                                                                                                                                                                                                                                                                                                                      |                                                                                                                                                                                                                                                                                                                                                                                                                                                                                                                                                                                                                                                                      |
| Theta 5–7 Hz                        | <ul style="list-style-type: none"><li>Progressive increase of the theta activity in the posterior region until it reaches a plateau, with greater involvement of the precuneus and cuneus [Fernandez Guerrero and Achermann, 2019 (53); Park <i>et al.</i>, 2015 (48)]</li></ul>                                                                                                                                                                                                                                                                                                                                                                                                                                                                                                                                                                                                                                                                                                                                                                                                                                                                                                                                                                                                                                                                                                                                                                                                                                                                                                                                                                                                                                                                                                                                                                                                                                                                                                                                                                                                                                                                                                                                                                                                 | <p>Strengths:</p> <ul style="list-style-type: none"><li>Captures the microstructure of Sleep Onset Process (SOP), and its temporal dynamics detecting fluctuations in arousal and stage shifting</li></ul>                                                                                                                                                                                                                                                                                                                                                                                                                                                           |
| Alpha 8–12 Hz                       | <ul style="list-style-type: none"><li>Progressive increase of the alpha activity during the SOP, with highest values in the precuneus [Fernandez Guerrero and Achermann, 2019 (53); Park <i>et al.</i>, 2015 (48)]</li></ul>                                                                                                                                                                                                                                                                                                                                                                                                                                                                                                                                                                                                                                                                                                                                                                                                                                                                                                                                                                                                                                                                                                                                                                                                                                                                                                                                                                                                                                                                                                                                                                                                                                                                                                                                                                                                                                                                                                                                                                                                                                                     | <ul style="list-style-type: none"><li>Allows for principled characterization of SOP, and diagnosis of SOP pathologies</li><li>EEG changes to be very systematic with a precise ordinal relationship between the Hori nine stages and reaction time</li></ul>                                                                                                                                                                                                                                                                                                                                                                                                         |
| Sigma 12–15 Hz                      | <ul style="list-style-type: none"><li>Progressive increase of the sigma activity post-SO, with the most salient involvement of the parietal lobe and a secondary contribution of the postcentral gyrus, the cuneus, and the lingual gyrus [Fernandez Guerrero and Achermann, 2019 (53)]</li><li>Earlier sigma peak but reduced activity involving fewer brain regions involved following SD [Fernandez Guerrero and Achermann, 2019 (53)]</li></ul>                                                                                                                                                                                                                                                                                                                                                                                                                                                                                                                                                                                                                                                                                                                                                                                                                                                                                                                                                                                                                                                                                                                                                                                                                                                                                                                                                                                                                                                                                                                                                                                                                                                                                                                                                                                                                              | <p>Limitations:</p> <ul style="list-style-type: none"><li>Labour intensive</li><li>Time-consuming</li><li>Subjective</li><li>Does not account for phenomena such as K-complex associated arousals or mid temporal theta of drowsiness</li></ul>                                                                                                                                                                                                                                                                                                                                                                                                                      |
| Beta 16–24 Hz                       | <ul style="list-style-type: none"><li>Progressive reduction of the beta activity, with greater involvement of the parietal and occipital lobes [Fernandez Guerrero and Achermann, 2019 (53); Park <i>et al.</i>, 2015 (48)]</li></ul>                                                                                                                                                                                                                                                                                                                                                                                                                                                                                                                                                                                                                                                                                                                                                                                                                                                                                                                                                                                                                                                                                                                                                                                                                                                                                                                                                                                                                                                                                                                                                                                                                                                                                                                                                                                                                                                                                                                                                                                                                                            | <ul style="list-style-type: none"><li>Cannot be used for people in whom alpha levels are suppressed</li><li>Can cause frequency bias during automated analyses, especially if an adequate number of samples (epochs) is not averaged.</li></ul>                                                                                                                                                                                                                                                                                                                                                                                                                      |
| Gamma 25–40 Hz                      | <ul style="list-style-type: none"><li>Faster decrease of the beta activity following SD [Fernandez Guerrero and Achermann, 2019 (53)]</li></ul>                                                                                                                                                                                                                                                                                                                                                                                                                                                                                                                                                                                                                                                                                                                                                                                                                                                                                                                                                                                                                                                                                                                                                                                                                                                                                                                                                                                                                                                                                                                                                                                                                                                                                                                                                                                                                                                                                                                                                                                                                                                                                                                                  | <ul style="list-style-type: none"><li>May not provide an effective tool for the identification of various sleep pathologies</li><li>But can only be used for the sleep onset changes</li></ul>                                                                                                                                                                                                                                                                                                                                                                                                                                                                       |
| EEG event                           |                                                                                                                                                                                                                                                                                                                                                                                                                                                                                                                                                                                                                                                                                                                                                                                                                                                                                                                                                                                                                                                                                                                                                                                                                                                                                                                                                                                                                                                                                                                                                                                                                                                                                                                                                                                                                                                                                                                                                                                                                                                                                                                                                                                                                                                                                  |                                                                                                                                                                                                                                                                                                                                                                                                                                                                                                                                                                                                                                                                      |
| Delta <4 Hz                         | <ul style="list-style-type: none"><li>Early SO slow-waves marked with large amplitudes, steep slopes, with frontomedial prevalence, and originating from the sensorimotor and the posteromedial parietal cortex [Siclari <i>et al.</i>, 2014 (49)]</li><li>Late SO slow-wave marked with smaller amplitudes and slopes, involving circumscribed parts of the cortex, with more evenly distributed origins [Siclari <i>et al.</i>, 2014 (49)]</li></ul>                                                                                                                                                                                                                                                                                                                                                                                                                                                                                                                                                                                                                                                                                                                                                                                                                                                                                                                                                                                                                                                                                                                                                                                                                                                                                                                                                                                                                                                                                                                                                                                                                                                                                                                                                                                                                           |                                                                                                                                                                                                                                                                                                                                                                                                                                                                                                                                                                                                                                                                      |
| Theta 5–7 Hz                        | Not assessed                                                                                                                                                                                                                                                                                                                                                                                                                                                                                                                                                                                                                                                                                                                                                                                                                                                                                                                                                                                                                                                                                                                                                                                                                                                                                                                                                                                                                                                                                                                                                                                                                                                                                                                                                                                                                                                                                                                                                                                                                                                                                                                                                                                                                                                                     |                                                                                                                                                                                                                                                                                                                                                                                                                                                                                                                                                                                                                                                                      |
| Alpha 8–12 Hz                       | Not assessed                                                                                                                                                                                                                                                                                                                                                                                                                                                                                                                                                                                                                                                                                                                                                                                                                                                                                                                                                                                                                                                                                                                                                                                                                                                                                                                                                                                                                                                                                                                                                                                                                                                                                                                                                                                                                                                                                                                                                                                                                                                                                                                                                                                                                                                                     |                                                                                                                                                                                                                                                                                                                                                                                                                                                                                                                                                                                                                                                                      |
| Sigma 12–15 Hz                      | Early SO spindles are sparse, fast and predominantly local followed by a progressively slower, more diffuse and numerous patterns, involving more regions [Siclari <i>et al.</i> , 2014 (49)]<br>Slow frontal spindles originate from anterior cingulate cortex and medial/lateral prefrontal cortex and fast centroparietal spindles from the precuneus and posterior cingulate cortex [Siclari <i>et al.</i> , 2014 (49)]                                                                                                                                                                                                                                                                                                                                                                                                                                                                                                                                                                                                                                                                                                                                                                                                                                                                                                                                                                                                                                                                                                                                                                                                                                                                                                                                                                                                                                                                                                                                                                                                                                                                                                                                                                                                                                                      |                                                                                                                                                                                                                                                                                                                                                                                                                                                                                                                                                                                                                                                                      |
| Beta 16–24 Hz                       | Not assessed                                                                                                                                                                                                                                                                                                                                                                                                                                                                                                                                                                                                                                                                                                                                                                                                                                                                                                                                                                                                                                                                                                                                                                                                                                                                                                                                                                                                                                                                                                                                                                                                                                                                                                                                                                                                                                                                                                                                                                                                                                                                                                                                                                                                                                                                     |                                                                                                                                                                                                                                                                                                                                                                                                                                                                                                                                                                                                                                                                      |
| Gamma 25–40 Hz                      | Not assessed                                                                                                                                                                                                                                                                                                                                                                                                                                                                                                                                                                                                                                                                                                                                                                                                                                                                                                                                                                                                                                                                                                                                                                                                                                                                                                                                                                                                                                                                                                                                                                                                                                                                                                                                                                                                                                                                                                                                                                                                                                                                                                                                                                                                                                                                     |                                                                                                                                                                                                                                                                                                                                                                                                                                                                                                                                                                                                                                                                      |
| Cortical connectivity               |                                                                                                                                                                                                                                                                                                                                                                                                                                                                                                                                                                                                                                                                                                                                                                                                                                                                                                                                                                                                                                                                                                                                                                                                                                                                                                                                                                                                                                                                                                                                                                                                                                                                                                                                                                                                                                                                                                                                                                                                                                                                                                                                                                                                                                                                                  |                                                                                                                                                                                                                                                                                                                                                                                                                                                                                                                                                                                                                                                                      |
| Delta <4 Hz                         | <ul style="list-style-type: none"><li>Increased cortical coherence within ipsilateral frontal and central regions and also between contralateral frontal and central homologues during SO [Morikawa <i>et al.</i>, 1997 (56); Tanaka <i>et al.</i>, 1999 (120); 2000 (51)]</li><li>Increased coherence at the delta band during pre-SO compared with SO [De Gennaro <i>et al.</i>, 2004 (54)]</li><li>Progressive decrease of antero-posterior synchrony followed by a post-SO transition to an anterior-to-posterior propagation [De Gennaro <i>et al.</i>, 2004 (54), 2005 (55)]</li><li>Pre-SO dominated by the occipital-to-frontal information flow at delta band with SO being dominated by the frontal-to-parieto-occipital information flow at all bands [De Gennaro <i>et al.</i>, 2004 (54)]</li><li>Higher local interconnectedness during SOP [Ferri <i>et al.</i>, 2008 (62)] and lower long-range functional connectedness during more stable sleep [Vecchio <i>et al.</i>, 2017 (61)]</li><li>Higher level of connectivity from MPFC to the bilateral HPC and LPFC but decreased connection from DPFC and ipsilateral HPC [Fernandez Guerrero and Achermann, 2018 (57)]</li><li>Anterior-posterior decoupling of the DMN but enhanced connectivity between the PCC and both anterior and posterior cortical regions [Fernandez Guerrero and Achermann, 2018 (57)]</li></ul>                                                                                                                                                                                                                                                                                                                                                                                                                                                                                                                                                                                                                                                                                                                                                                                                                                                                                       |                                                                                                                                                                                                                                                                                                                                                                                                                                                                                                                                                                                                                                                                      |
| Theta 5–7 Hz                        | <ul style="list-style-type: none"><li>Increased ipsilateral and inter- hemispheric frontal and central coherence [Morikawa <i>et al.</i>, 1997 (56); Tanaka <i>et al.</i>, 2000 (51)]</li><li>Increased coherence at the theta band during pre-SO compared with SO [De Gennaro <i>et al.</i>, 2004 (54)]</li><li>Reduction in antero-posterior synchrony [Morikawa <i>et al.</i>, 1997 (56)], with a post-SO shift to an anterior-to-posterior propagation [De Gennaro <i>et al.</i>, 2004 (54)]</li><li>Pre-SO dominated by the occipital-to-frontal information flow at theta bands with SO being dominated by frontal-to-parieto-occipital information flow at all bands [De Gennaro <i>et al.</i>, 2004 (54)]</li><li>Following SO, theta activity modulates bidirectional information flow between the PCC and the bilateral IPL and the HPC, and from the bilateral HPC to the MCC [Fernandez Guerrero and Achermann, 2018 (57)]</li></ul>                                                                                                                                                                                                                                                                                                                                                                                                                                                                                                                                                                                                                                                                                                                                                                                                                                                                                                                                                                                                                                                                                                                                                                                                                                                                                                                                 |                                                                                                                                                                                                                                                                                                                                                                                                                                                                                                                                                                                                                                                                      |
| Alpha 8–12 Hz                       | <ul style="list-style-type: none"><li>Decreased antero-posterior coherence and inter-hemispheric frontal coherence, and increased posterior coherence [Wright <i>et al.</i>, 1995 (38); Morikawa <i>et al.</i>, 2002 (60)]</li><li>Pre-SO dominated by the occipital-to-frontal information flow at alpha bands during pre-SO with SO being dominated by the frontal-to-parieto-occipital information flow at all bands [De Gennaro <i>et al.</i>, 2004 (54)]</li><li>Increased coherence in the upper alpha sub-band (11–12 Hz) with the beginning of sleep NREM-II along the antero-posterior gradient [De Gennaro <i>et al.</i>, 2004 (54); Morikawa <i>et al.</i>, 2002 (60); Tanaka <i>et al.</i>, 1997 (50)]</li><li>Increased connectivity from the PCC to most brain regions [Fernandez Guerrero and Achermann, 2018 (57)]</li></ul>                                                                                                                                                                                                                                                                                                                                                                                                                                                                                                                                                                                                                                                                                                                                                                                                                                                                                                                                                                                                                                                                                                                                                                                                                                                                                                                                                                                                                                     |                                                                                                                                                                                                                                                                                                                                                                                                                                                                                                                                                                                                                                                                      |
| Sigma 12–15 Hz                      | <ul style="list-style-type: none"><li>Widespread coherence at the beginning of sleep, with a steeper increase in posterior regions [Morikawa <i>et al.</i>, 2002 (60)]</li><li>The frontal-to-parieto-occipital information flow at all bands during the SO [De Gennaro <i>et al.</i>, 2004 (54)]</li><li>Increased local and global interconnectivity in the frontal regions [Ferri <i>et al.</i>, 2008 (62); Vecchio <i>et al.</i>, 2017 (61)]</li><li>Increased connectivity after SO, with a stronger connectivity between the MCC and PCC with other regions [Fernandez Guerrero and Achermann, 2018 (57)]</li><li>Increased impact of MCC on the left IPL and a decreased impact on the right DPFC following SD [Fernandez Guerrero and Achermann, 2018 (57)]</li></ul>                                                                                                                                                                                                                                                                                                                                                                                                                                                                                                                                                                                                                                                                                                                                                                                                                                                                                                                                                                                                                                                                                                                                                                                                                                                                                                                                                                                                                                                                                                    |                                                                                                                                                                                                                                                                                                                                                                                                                                                                                                                                                                                                                                                                      |
| Beta 16–24 Hz                       | <ul style="list-style-type: none"><li>Increased beta propagation from frontal to parieto-occipital regions-inversion of the direction of information flow [De Gennaro <i>et al.</i>, 2004 (54)]</li></ul>                                                                                                                                                                                                                                                                                                                                                                                                                                                                                                                                                                                                                                                                                                                                                                                                                                                                                                                                                                                                                                                                                                                                                                                                                                                                                                                                                                                                                                                                                                                                                                                                                                                                                                                                                                                                                                                                                                                                                                                                                                                                        |                                                                                                                                                                                                                                                                                                                                                                                                                                                                                                                                                                                                                                                                      |
| Gama 25–40 Hz                       | <ul style="list-style-type: none"><li>Gamma activity not assessed</li></ul>                                                                                                                                                                                                                                                                                                                                                                                                                                                                                                                                                                                                                                                                                                                                                                                                                                                                                                                                                                                                                                                                                                                                                                                                                                                                                                                                                                                                                                                                                                                                                                                                                                                                                                                                                                                                                                                                                                                                                                                                                                                                                                                                                                                                      |                                                                                                                                                                                                                                                                                                                                                                                                                                                                                                                                                                                                                                                                      |
| Sub-division of EEG frequency bands |                                                                                                                                                                                                                                                                                                                                                                                                                                                                                                                                                                                                                                                                                                                                                                                                                                                                                                                                                                                                                                                                                                                                                                                                                                                                                                                                                                                                                                                                                                                                                                                                                                                                                                                                                                                                                                                                                                                                                                                                                                                                                                                                                                                                                                                                                  |                                                                                                                                                                                                                                                                                                                                                                                                                                                                                                                                                                                                                                                                      |
|                                     | <ul style="list-style-type: none"><li>82% and 78% of the occurrences of SO within a two-minute error for the NREM-I and spindle criteria respectively [Agnew and Webb, 1972 (100)]</li><li>The beginning of SO marked with increased delta and theta power and decreased alpha-1 power in the occipital lobe, and increased theta power in the parietal lobe followed by widespread decrease in alpha-1 and alpha-2 powers and greater increases of theta power in the occipitoparietal lobe. More stable sleep led to decreased, beta-2 and beta-3, powers decreased mainly in the frontal lobe and some regions of the parieto-temporo-limbic area [Park <i>et al.</i>, 2015 (48)]</li><li>Ordinal relationship between RT and the nine Hori stages: mean RT increased as each of stages H1 through H9 was entered corresponding to their subjective reports [Hori, Hayashi, Morikawa, 1994 (40)]</li><li>Increased delta and theta activities from the VSWs [the Hori stages 6 and 7] in the anterior-central regions [Tanaka <i>et al.</i>, 1998 (121)]</li><li>Increased alpha-3 sub-band activities from the Hori stage 9 in the anterior-central regions [Tanaka <i>et al.</i>, 1998 (121)]</li><li>Increased sigma activities from the Hori stage 8 in the central parietal regions [Tanaka <i>et al.</i>, 1998 (121)]</li><li>Decreased posterior dominant alpha-band with the disappearance of alpha-wave (H3 to H4); and increased theta, delta, alpha-3, and sigma-band activities with the emergence of VSWs (H6) [Tanaka <i>et al.</i>, 1997 (50); 2000 (51)]</li><li>Decreased alpha-2 coherence decreased from H3 during the SOP [Tanaka <i>et al.</i>, 1997 (50); 2000 (51)]</li><li>Rise of delta, theta, and alpha-3 coherence from H7, with these increases being associated with the onset of VSWs [Tanaka <i>et al.</i>, 1997 (50); 2000 (51)]</li><li>Increased average time of the alpha-wave train, intermittent (&gt;50%) and the EEG flattening stage on Night 1[Tamaki <i>et al.</i>, 2005 (122)]</li><li>Increased stage changes on Night 1 [Tamaki <i>et al.</i>, 2005 (122)]</li><li>Increased stage changes between the alpha-wave intermittent stage (&lt;50%) and the theta wave stage on Night 3 [Tamaki <i>et al.</i>, 2005 (122)]</li></ul> |                                                                                                                                                                                                                                                                                                                                                                                                                                                                                                                                                                                                                                                                      |

Table S1 (continued)

| Table S1 <i>(continued)</i>                                                                                                                                                                                                                                                                                                                                                                                                                                                                                                                                                                                                                                                                                        |                                                                                                                                                                                                                                                                                                                                                                                                                                                                                                                                                                                                                                                                                                                                                                                                                                                                                                                                                                                                                                                                                                                                                                                                                                                                                                                                                                                                                                                                                                                                                                                                                                                                                                                                                                                                                                                                                                                                                                                                                                                                                                                                                                                                                                                                                                                                                                                                                                                                                                                                                                                                                                                                                                                                                                                                                                                                                                                                                                                                                                                                                                                                                                                                                                                                                                                                                                                                                                                                                                                                                                                                                                                                                                                                                                                                                                                                                                                                                                                                                                                                                                                                                                                                                                                                                                                                                                                                                                                                                                                                                                                                                                                                                                                                                                                                                                                                                                                                                                                                                                                        |                                                                                                                                                                                                                                                                                                                                                                                                                                                                                                                                                                                                                                                                                                                                                                                                           |                                                                                                                                                                                                                                                                                                                                                                                                                                                                                                                                                                                                                                                                                                                                           |                                                                                                                                                                                                                                                                                                                                                                                                                                                                                                                                                                                                                                                                                                         |                                                                                                                                                                                                                                                                                                                                                                                                                                                                                                                                                                                                                                                                                                                                                                                                                                                                                  |                                                                                                                                                                                                                                                                                                                                                                                                                                                                                                                                                                                                                                                                                                         |
|--------------------------------------------------------------------------------------------------------------------------------------------------------------------------------------------------------------------------------------------------------------------------------------------------------------------------------------------------------------------------------------------------------------------------------------------------------------------------------------------------------------------------------------------------------------------------------------------------------------------------------------------------------------------------------------------------------------------|--------------------------------------------------------------------------------------------------------------------------------------------------------------------------------------------------------------------------------------------------------------------------------------------------------------------------------------------------------------------------------------------------------------------------------------------------------------------------------------------------------------------------------------------------------------------------------------------------------------------------------------------------------------------------------------------------------------------------------------------------------------------------------------------------------------------------------------------------------------------------------------------------------------------------------------------------------------------------------------------------------------------------------------------------------------------------------------------------------------------------------------------------------------------------------------------------------------------------------------------------------------------------------------------------------------------------------------------------------------------------------------------------------------------------------------------------------------------------------------------------------------------------------------------------------------------------------------------------------------------------------------------------------------------------------------------------------------------------------------------------------------------------------------------------------------------------------------------------------------------------------------------------------------------------------------------------------------------------------------------------------------------------------------------------------------------------------------------------------------------------------------------------------------------------------------------------------------------------------------------------------------------------------------------------------------------------------------------------------------------------------------------------------------------------------------------------------------------------------------------------------------------------------------------------------------------------------------------------------------------------------------------------------------------------------------------------------------------------------------------------------------------------------------------------------------------------------------------------------------------------------------------------------------------------------------------------------------------------------------------------------------------------------------------------------------------------------------------------------------------------------------------------------------------------------------------------------------------------------------------------------------------------------------------------------------------------------------------------------------------------------------------------------------------------------------------------------------------------------------------------------------------------------------------------------------------------------------------------------------------------------------------------------------------------------------------------------------------------------------------------------------------------------------------------------------------------------------------------------------------------------------------------------------------------------------------------------------------------------------------------------------------------------------------------------------------------------------------------------------------------------------------------------------------------------------------------------------------------------------------------------------------------------------------------------------------------------------------------------------------------------------------------------------------------------------------------------------------------------------------------------------------------------------------------------------------------------------------------------------------------------------------------------------------------------------------------------------------------------------------------------------------------------------------------------------------------------------------------------------------------------------------------------------------------------------------------------------------------------------------------------------------------------------------------------|-----------------------------------------------------------------------------------------------------------------------------------------------------------------------------------------------------------------------------------------------------------------------------------------------------------------------------------------------------------------------------------------------------------------------------------------------------------------------------------------------------------------------------------------------------------------------------------------------------------------------------------------------------------------------------------------------------------------------------------------------------------------------------------------------------------|-------------------------------------------------------------------------------------------------------------------------------------------------------------------------------------------------------------------------------------------------------------------------------------------------------------------------------------------------------------------------------------------------------------------------------------------------------------------------------------------------------------------------------------------------------------------------------------------------------------------------------------------------------------------------------------------------------------------------------------------|---------------------------------------------------------------------------------------------------------------------------------------------------------------------------------------------------------------------------------------------------------------------------------------------------------------------------------------------------------------------------------------------------------------------------------------------------------------------------------------------------------------------------------------------------------------------------------------------------------------------------------------------------------------------------------------------------------|----------------------------------------------------------------------------------------------------------------------------------------------------------------------------------------------------------------------------------------------------------------------------------------------------------------------------------------------------------------------------------------------------------------------------------------------------------------------------------------------------------------------------------------------------------------------------------------------------------------------------------------------------------------------------------------------------------------------------------------------------------------------------------------------------------------------------------------------------------------------------------|---------------------------------------------------------------------------------------------------------------------------------------------------------------------------------------------------------------------------------------------------------------------------------------------------------------------------------------------------------------------------------------------------------------------------------------------------------------------------------------------------------------------------------------------------------------------------------------------------------------------------------------------------------------------------------------------------------|
| Method of study                                                                                                                                                                                                                                                                                                                                                                                                                                                                                                                                                                                                                                                                                                    | Main findings                                                                                                                                                                                                                                                                                                                                                                                                                                                                                                                                                                                                                                                                                                                                                                                                                                                                                                                                                                                                                                                                                                                                                                                                                                                                                                                                                                                                                                                                                                                                                                                                                                                                                                                                                                                                                                                                                                                                                                                                                                                                                                                                                                                                                                                                                                                                                                                                                                                                                                                                                                                                                                                                                                                                                                                                                                                                                                                                                                                                                                                                                                                                                                                                                                                                                                                                                                                                                                                                                                                                                                                                                                                                                                                                                                                                                                                                                                                                                                                                                                                                                                                                                                                                                                                                                                                                                                                                                                                                                                                                                                                                                                                                                                                                                                                                                                                                                                                                                                                                                                          | Evaluation                                                                                                                                                                                                                                                                                                                                                                                                                                                                                                                                                                                                                                                                                                                                                                                                |                                                                                                                                                                                                                                                                                                                                                                                                                                                                                                                                                                                                                                                                                                                                           |                                                                                                                                                                                                                                                                                                                                                                                                                                                                                                                                                                                                                                                                                                         |                                                                                                                                                                                                                                                                                                                                                                                                                                                                                                                                                                                                                                                                                                                                                                                                                                                                                  |                                                                                                                                                                                                                                                                                                                                                                                                                                                                                                                                                                                                                                                                                                         |
| Event-related potentials                                                                                                                                                                                                                                                                                                                                                                                                                                                                                                                                                                                                                                                                                           |                                                                                                                                                                                                                                                                                                                                                                                                                                                                                                                                                                                                                                                                                                                                                                                                                                                                                                                                                                                                                                                                                                                                                                                                                                                                                                                                                                                                                                                                                                                                                                                                                                                                                                                                                                                                                                                                                                                                                                                                                                                                                                                                                                                                                                                                                                                                                                                                                                                                                                                                                                                                                                                                                                                                                                                                                                                                                                                                                                                                                                                                                                                                                                                                                                                                                                                                                                                                                                                                                                                                                                                                                                                                                                                                                                                                                                                                                                                                                                                                                                                                                                                                                                                                                                                                                                                                                                                                                                                                                                                                                                                                                                                                                                                                                                                                                                                                                                                                                                                                                                                        |                                                                                                                                                                                                                                                                                                                                                                                                                                                                                                                                                                                                                                                                                                                                                                                                           |                                                                                                                                                                                                                                                                                                                                                                                                                                                                                                                                                                                                                                                                                                                                           |                                                                                                                                                                                                                                                                                                                                                                                                                                                                                                                                                                                                                                                                                                         |                                                                                                                                                                                                                                                                                                                                                                                                                                                                                                                                                                                                                                                                                                                                                                                                                                                                                  |                                                                                                                                                                                                                                                                                                                                                                                                                                                                                                                                                                                                                                                                                                         |
| Auditory-related evoked potentials                                                                                                                                                                                                                                                                                                                                                                                                                                                                                                                                                                                                                                                                                 |                                                                                                                                                                                                                                                                                                                                                                                                                                                                                                                                                                                                                                                                                                                                                                                                                                                                                                                                                                                                                                                                                                                                                                                                                                                                                                                                                                                                                                                                                                                                                                                                                                                                                                                                                                                                                                                                                                                                                                                                                                                                                                                                                                                                                                                                                                                                                                                                                                                                                                                                                                                                                                                                                                                                                                                                                                                                                                                                                                                                                                                                                                                                                                                                                                                                                                                                                                                                                                                                                                                                                                                                                                                                                                                                                                                                                                                                                                                                                                                                                                                                                                                                                                                                                                                                                                                                                                                                                                                                                                                                                                                                                                                                                                                                                                                                                                                                                                                                                                                                                                                        |                                                                                                                                                                                                                                                                                                                                                                                                                                                                                                                                                                                                                                                                                                                                                                                                           |                                                                                                                                                                                                                                                                                                                                                                                                                                                                                                                                                                                                                                                                                                                                           |                                                                                                                                                                                                                                                                                                                                                                                                                                                                                                                                                                                                                                                                                                         |                                                                                                                                                                                                                                                                                                                                                                                                                                                                                                                                                                                                                                                                                                                                                                                                                                                                                  |                                                                                                                                                                                                                                                                                                                                                                                                                                                                                                                                                                                                                                                                                                         |
| P1                                                                                                                                                                                                                                                                                                                                                                                                                                                                                                                                                                                                                                                                                                                 | <ul style="list-style-type: none"><li>P1 became increasingly augmented during SO [Ogilvie <i>et al.</i>, 1991 (52); de Lugt <i>et al.</i>, 1996 (123)]</li></ul>                                                                                                                                                                                                                                                                                                                                                                                                                                                                                                                                                                                                                                                                                                                                                                                                                                                                                                                                                                                                                                                                                                                                                                                                                                                                                                                                                                                                                                                                                                                                                                                                                                                                                                                                                                                                                                                                                                                                                                                                                                                                                                                                                                                                                                                                                                                                                                                                                                                                                                                                                                                                                                                                                                                                                                                                                                                                                                                                                                                                                                                                                                                                                                                                                                                                                                                                                                                                                                                                                                                                                                                                                                                                                                                                                                                                                                                                                                                                                                                                                                                                                                                                                                                                                                                                                                                                                                                                                                                                                                                                                                                                                                                                                                                                                                                                                                                                                       | <strong>Strengths:</strong> <ul style="list-style-type: none"><li>The ease of recording, consistency with which the components occur, and their stimulus modality independence make them ideal candidates for use in the study of sleep-related pathology</li></ul> <strong>Allows for the identification of complex changes in information processing as sleep begins</strong> <ul style="list-style-type: none"><li>High temporal resolution</li></ul> <strong>Limitations:</strong> <ul style="list-style-type: none"><li>SO duration can be very short, lasting only a few minutes in some subjects. Because of the short duration of the sleep onset period, there may not be sufficient time to present enough trials to allow the ERP to emerge from the large-amplitude background EEG.</li></ul> |                                                                                                                                                                                                                                                                                                                                                                                                                                                                                                                                                                                                                                                                                                                                           |                                                                                                                                                                                                                                                                                                                                                                                                                                                                                                                                                                                                                                                                                                         |                                                                                                                                                                                                                                                                                                                                                                                                                                                                                                                                                                                                                                                                                                                                                                                                                                                                                  |                                                                                                                                                                                                                                                                                                                                                                                                                                                                                                                                                                                                                                                                                                         |
| N1                                                                                                                                                                                                                                                                                                                                                                                                                                                                                                                                                                                                                                                                                                                 | <ul style="list-style-type: none"><li>With increased RT, N1 becomes smaller in amplitude reaching baseline when subjects fail to respond [Colrain <i>et al</i> 2000 (124); Cote <i>et al.</i>, 2002 (125); de Lugt <i>et al</i>, 1996 (123); Harsh <i>et al.</i>, 1994 (126); Nielsen-Bohman <i>et al.</i>, 1991 (127); Ogilvie <i>et al.</i>, 1991 (52); Winter <i>et al</i>, 1995 (128); Yasuda <i>et al.</i>, 2011 (129)]</li><li>At a rapid rate of stimulus presentation [every 600 ms], N1 became increasingly attenuated at SO [de Lugt <i>et al.</i>, 1996 (123)]</li></ul>                                                                                                                                                                                                                                                                                                                                                                                                                                                                                                                                                                                                                                                                                                                                                                                                                                                                                                                                                                                                                                                                                                                                                                                                                                                                                                                                                                                                                                                                                                                                                                                                                                                                                                                                                                                                                                                                                                                                                                                                                                                                                                                                                                                                                                                                                                                                                                                                                                                                                                                                                                                                                                                                                                                                                                                                                                                                                                                                                                                                                                                                                                                                                                                                                                                                                                                                                                                                                                                                                                                                                                                                                                                                                                                                                                                                                                                                                                                                                                                                                                                                                                                                                                                                                                                                                                                                                                                                                                                                    |                                                                                                                                                                                                                                                                                                                                                                                                                                                                                                                                                                                                                                                                                                                                                                                                           |                                                                                                                                                                                                                                                                                                                                                                                                                                                                                                                                                                                                                                                                                                                                           |                                                                                                                                                                                                                                                                                                                                                                                                                                                                                                                                                                                                                                                                                                         |                                                                                                                                                                                                                                                                                                                                                                                                                                                                                                                                                                                                                                                                                                                                                                                                                                                                                  |                                                                                                                                                                                                                                                                                                                                                                                                                                                                                                                                                                                                                                                                                                         |
| P2                                                                                                                                                                                                                                                                                                                                                                                                                                                                                                                                                                                                                                                                                                                 | <ul style="list-style-type: none"><li>With increased RT, the amplitude of P2 increases reaching its maximum when subjects fail to respond following SO [Cote <i>et al.</i>, 2002 (125); Harsh <i>et al</i> 1994 (126); Ogilvie <i>et al.</i>, 1991 (52); Winter <i>et al.</i>, 1995 (128); Yasuda <i>et al.</i>, 2011 (129)]</li><li>During NREM-II sleep, the P2 amplitude more than doubled in size [Ogilvie <i>et al</i>, 1991 (52)]</li><li>At a rapid rate of stimulus presentation [every 600 ms] P2 became increasingly augmented at SO [de Lugt <i>et al.</i>, 1996 (123)]</li><li>SD had no effect on P2 amplitude [Peszka and Harsh, 2002 (130)]</li></ul>                                                                                                                                                                                                                                                                                                                                                                                                                                                                                                                                                                                                                                                                                                                                                                                                                                                                                                                                                                                                                                                                                                                                                                                                                                                                                                                                                                                                                                                                                                                                                                                                                                                                                                                                                                                                                                                                                                                                                                                                                                                                                                                                                                                                                                                                                                                                                                                                                                                                                                                                                                                                                                                                                                                                                                                                                                                                                                                                                                                                                                                                                                                                                                                                                                                                                                                                                                                                                                                                                                                                                                                                                                                                                                                                                                                                                                                                                                                                                                                                                                                                                                                                                                                                                                                                                                                                                                                   |                                                                                                                                                                                                                                                                                                                                                                                                                                                                                                                                                                                                                                                                                                                                                                                                           |                                                                                                                                                                                                                                                                                                                                                                                                                                                                                                                                                                                                                                                                                                                                           |                                                                                                                                                                                                                                                                                                                                                                                                                                                                                                                                                                                                                                                                                                         |                                                                                                                                                                                                                                                                                                                                                                                                                                                                                                                                                                                                                                                                                                                                                                                                                                                                                  |                                                                                                                                                                                                                                                                                                                                                                                                                                                                                                                                                                                                                                                                                                         |
| N2/N350                                                                                                                                                                                                                                                                                                                                                                                                                                                                                                                                                                                                                                                                                                            | <ul style="list-style-type: none"><li>It starts to appear during NREM-I-theta early in SO [Colrain <i>et al.</i>, 2000 (124); Harsh <i>et al.</i>, 1994 (126); Ogilvie <i>et al.</i>, 1991 (52)]</li><li>It is related to VSWs associated SO [Colrain <i>et al.</i>, 2000 (131); Harsh <i>et al.</i>, 1994 (126); Peszka and Harsh, 2002 (130); Yasuda <i>et al.</i>, 2011 (129)] and a KC associated SO with reduced amplitude [Colrain <i>et al.</i>, 2000 (124); Yasuda <i>et al</i>, 2011 (129)]</li><li>The absence of N2 at a rapid rate of stimulus presentation [every 600 ms] at SO [de Lugt <i>et al.</i>, 1996 (123)]</li><li>N350 amplitude increased with SO following increased tone intensity and SD [Peszka and Harsh, 2002 (130)]</li><li>Larger N350 at SO for deviant than for standard stimuli [Nielsen-Bohman <i>et al.</i>, 1991 (127); Winter <i>et al.</i>, 1995 (128)]</li></ul>                                                                                                                                                                                                                                                                                                                                                                                                                                                                                                                                                                                                                                                                                                                                                                                                                                                                                                                                                                                                                                                                                                                                                                                                                                                                                                                                                                                                                                                                                                                                                                                                                                                                                                                                                                                                                                                                                                                                                                                                                                                                                                                                                                                                                                                                                                                                                                                                                                                                                                                                                                                                                                                                                                                                                                                                                                                                                                                                                                                                                                                                                                                                                                                                                                                                                                                                                                                                                                                                                                                                                                                                                                                                                                                                                                                                                                                                                                                                                                                                                                                                                                                                              |                                                                                                                                                                                                                                                                                                                                                                                                                                                                                                                                                                                                                                                                                                                                                                                                           |                                                                                                                                                                                                                                                                                                                                                                                                                                                                                                                                                                                                                                                                                                                                           |                                                                                                                                                                                                                                                                                                                                                                                                                                                                                                                                                                                                                                                                                                         |                                                                                                                                                                                                                                                                                                                                                                                                                                                                                                                                                                                                                                                                                                                                                                                                                                                                                  |                                                                                                                                                                                                                                                                                                                                                                                                                                                                                                                                                                                                                                                                                                         |
| P3/P300                                                                                                                                                                                                                                                                                                                                                                                                                                                                                                                                                                                                                                                                                                            | <ul style="list-style-type: none"><li>A decline in the amplitude of P300 is observed in NREM-I-theta [Bastuji <i>et al.</i>, 1995 (132); Cote <i>et al.</i>, 2002 (125); Harsh <i>et al.</i>, 1994 (126); Ogilvie <i>et al.</i>, 1991 (52)] apparent at parietal sites rather than its frontal dispersion [Bastuji <i>et al.</i>, 1995 (132); Harsh <i>et al.</i>, 1994 (126)]</li><li>No P300 is observed in NREM-II or following undetected targets [Bastuji <i>et al.</i>, 1995 (132); Cote and Campbell, 1999 (133); Cote <i>et al.</i>, 2002 (125); Harsh <i>et al.</i>, 1994 (126); Ogilvie <i>et al.</i>, 1991 (52)] but only in responsive trials [Strauss <i>et al.</i>, 2022 (113)]</li><li>The long 400–450 ms latency of P300 with distinct posterior scalp distribution that is unique to SO but not being affected by the same experimental manipulations [Cote and Campbell, 1999 (133); Cote <i>et al.</i>, 2002 (125); Hull and Harsh, 2001 (134)]</li></ul>                                                                                                                                                                                                                                                                                                                                                                                                                                                                                                                                                                                                                                                                                                                                                                                                                                                                                                                                                                                                                                                                                                                                                                                                                                                                                                                                                                                                                                                                                                                                                                                                                                                                                                                                                                                                                                                                                                                                                                                                                                                                                                                                                                                                                                                                                                                                                                                                                                                                                                                                                                                                                                                                                                                                                                                                                                                                                                                                                                                                                                                                                                                                                                                                                                                                                                                                                                                                                                                                                                                                                                                                                                                                                                                                                                                                                                                                                                                                                                                                                                                                          |                                                                                                                                                                                                                                                                                                                                                                                                                                                                                                                                                                                                                                                                                                                                                                                                           |                                                                                                                                                                                                                                                                                                                                                                                                                                                                                                                                                                                                                                                                                                                                           |                                                                                                                                                                                                                                                                                                                                                                                                                                                                                                                                                                                                                                                                                                         |                                                                                                                                                                                                                                                                                                                                                                                                                                                                                                                                                                                                                                                                                                                                                                                                                                                                                  |                                                                                                                                                                                                                                                                                                                                                                                                                                                                                                                                                                                                                                                                                                         |
| N550                                                                                                                                                                                                                                                                                                                                                                                                                                                                                                                                                                                                                                                                                                               | <ul style="list-style-type: none"><li>N550 emerges in NREM-II sleep [Colrain <i>et al.</i>, 2000 (124)]</li><li>Increased N550 amplitude with SO following increased tone intensity and SD with its appearance related to VSWs [Peszka and Harsh, 2002 (130)]</li><li>Evident frontally in late SO [Harsh <i>et al.</i>, 1994 (126)]</li><li>Well-defined in response to targets in attended condition during NREM-II [Harsh <i>et al.</i>, 1994 (126)]</li></ul>                                                                                                                                                                                                                                                                                                                                                                                                                                                                                                                                                                                                                                                                                                                                                                                                                                                                                                                                                                                                                                                                                                                                                                                                                                                                                                                                                                                                                                                                                                                                                                                                                                                                                                                                                                                                                                                                                                                                                                                                                                                                                                                                                                                                                                                                                                                                                                                                                                                                                                                                                                                                                                                                                                                                                                                                                                                                                                                                                                                                                                                                                                                                                                                                                                                                                                                                                                                                                                                                                                                                                                                                                                                                                                                                                                                                                                                                                                                                                                                                                                                                                                                                                                                                                                                                                                                                                                                                                                                                                                                                                                                      |                                                                                                                                                                                                                                                                                                                                                                                                                                                                                                                                                                                                                                                                                                                                                                                                           |                                                                                                                                                                                                                                                                                                                                                                                                                                                                                                                                                                                                                                                                                                                                           |                                                                                                                                                                                                                                                                                                                                                                                                                                                                                                                                                                                                                                                                                                         |                                                                                                                                                                                                                                                                                                                                                                                                                                                                                                                                                                                                                                                                                                                                                                                                                                                                                  |                                                                                                                                                                                                                                                                                                                                                                                                                                                                                                                                                                                                                                                                                                         |
| P900                                                                                                                                                                                                                                                                                                                                                                                                                                                                                                                                                                                                                                                                                                               | <ul style="list-style-type: none"><li>Increased P900 amplitude with SO [Peszka and Harsh, 2002 (130)]</li><li>P900 related to the appearance of KCs with its amplitude larger with increased tone intensity and SD [Peszka and Harsh, 2002 (130)]</li><li>Well-defined in response to targets in attended condition during NREM-II [Harsh <i>et al.</i>, 1994 (126)]</li></ul>                                                                                                                                                                                                                                                                                                                                                                                                                                                                                                                                                                                                                                                                                                                                                                                                                                                                                                                                                                                                                                                                                                                                                                                                                                                                                                                                                                                                                                                                                                                                                                                                                                                                                                                                                                                                                                                                                                                                                                                                                                                                                                                                                                                                                                                                                                                                                                                                                                                                                                                                                                                                                                                                                                                                                                                                                                                                                                                                                                                                                                                                                                                                                                                                                                                                                                                                                                                                                                                                                                                                                                                                                                                                                                                                                                                                                                                                                                                                                                                                                                                                                                                                                                                                                                                                                                                                                                                                                                                                                                                                                                                                                                                                         |                                                                                                                                                                                                                                                                                                                                                                                                                                                                                                                                                                                                                                                                                                                                                                                                           |                                                                                                                                                                                                                                                                                                                                                                                                                                                                                                                                                                                                                                                                                                                                           |                                                                                                                                                                                                                                                                                                                                                                                                                                                                                                                                                                                                                                                                                                         |                                                                                                                                                                                                                                                                                                                                                                                                                                                                                                                                                                                                                                                                                                                                                                                                                                                                                  |                                                                                                                                                                                                                                                                                                                                                                                                                                                                                                                                                                                                                                                                                                         |
| Respiratory-related evoked potentials                                                                                                                                                                                                                                                                                                                                                                                                                                                                                                                                                                                                                                                                              |                                                                                                                                                                                                                                                                                                                                                                                                                                                                                                                                                                                                                                                                                                                                                                                                                                                                                                                                                                                                                                                                                                                                                                                                                                                                                                                                                                                                                                                                                                                                                                                                                                                                                                                                                                                                                                                                                                                                                                                                                                                                                                                                                                                                                                                                                                                                                                                                                                                                                                                                                                                                                                                                                                                                                                                                                                                                                                                                                                                                                                                                                                                                                                                                                                                                                                                                                                                                                                                                                                                                                                                                                                                                                                                                                                                                                                                                                                                                                                                                                                                                                                                                                                                                                                                                                                                                                                                                                                                                                                                                                                                                                                                                                                                                                                                                                                                                                                                                                                                                                                                        |                                                                                                                                                                                                                                                                                                                                                                                                                                                                                                                                                                                                                                                                                                                                                                                                           |                                                                                                                                                                                                                                                                                                                                                                                                                                                                                                                                                                                                                                                                                                                                           |                                                                                                                                                                                                                                                                                                                                                                                                                                                                                                                                                                                                                                                                                                         |                                                                                                                                                                                                                                                                                                                                                                                                                                                                                                                                                                                                                                                                                                                                                                                                                                                                                  |                                                                                                                                                                                                                                                                                                                                                                                                                                                                                                                                                                                                                                                                                                         |
| P1                                                                                                                                                                                                                                                                                                                                                                                                                                                                                                                                                                                                                                                                                                                 | <ul style="list-style-type: none"><li>P1 is reduced in NREM-I [Webster and Colrain, 1998 (135)]</li></ul>                                                                                                                                                                                                                                                                                                                                                                                                                                                                                                                                                                                                                                                                                                                                                                                                                                                                                                                                                                                                                                                                                                                                                                                                                                                                                                                                                                                                                                                                                                                                                                                                                                                                                                                                                                                                                                                                                                                                                                                                                                                                                                                                                                                                                                                                                                                                                                                                                                                                                                                                                                                                                                                                                                                                                                                                                                                                                                                                                                                                                                                                                                                                                                                                                                                                                                                                                                                                                                                                                                                                                                                                                                                                                                                                                                                                                                                                                                                                                                                                                                                                                                                                                                                                                                                                                                                                                                                                                                                                                                                                                                                                                                                                                                                                                                                                                                                                                                                                              |                                                                                                                                                                                                                                                                                                                                                                                                                                                                                                                                                                                                                                                                                                                                                                                                           | <strong>Strengths:</strong> <ul style="list-style-type: none"><li>Allows for directly measuring the local EEG activity in deep and subcortical cerebral structures</li></ul> <strong>Limitations:</strong> <ul style="list-style-type: none"><li>Invasive</li><li>Limited longevity resulting from high degree of invasiveness</li><li>Tendency of progressive worsening of recorded signal quality</li></ul>                                                                                                                                                                                                                                                                                                                             |                                                                                                                                                                                                                                                                                                                                                                                                                                                                                                                                                                                                                                                                                                         |                                                                                                                                                                                                                                                                                                                                                                                                                                                                                                                                                                                                                                                                                                                                                                                                                                                                                  |                                                                                                                                                                                                                                                                                                                                                                                                                                                                                                                                                                                                                                                                                                         |
| N1                                                                                                                                                                                                                                                                                                                                                                                                                                                                                                                                                                                                                                                                                                                 | <ul style="list-style-type: none"><li>Decrease in amplitude from wake to NREM-I [Webster and Colrain, 1998 (135)]</li><li>The respiratory stimulus elicited a N1 that decreased in amplitude at theta trials [Gora <i>et al.</i>, 1999 (136)]</li><li>NREM-II N1 further decreased relative to NREM-I theta [Gora <i>et al.</i>, 1999 (136)]</li></ul>                                                                                                                                                                                                                                                                                                                                                                                                                                                                                                                                                                                                                                                                                                                                                                                                                                                                                                                                                                                                                                                                                                                                                                                                                                                                                                                                                                                                                                                                                                                                                                                                                                                                                                                                                                                                                                                                                                                                                                                                                                                                                                                                                                                                                                                                                                                                                                                                                                                                                                                                                                                                                                                                                                                                                                                                                                                                                                                                                                                                                                                                                                                                                                                                                                                                                                                                                                                                                                                                                                                                                                                                                                                                                                                                                                                                                                                                                                                                                                                                                                                                                                                                                                                                                                                                                                                                                                                                                                                                                                                                                                                                                                                                                                 |                                                                                                                                                                                                                                                                                                                                                                                                                                                                                                                                                                                                                                                                                                                                                                                                           |                                                                                                                                                                                                                                                                                                                                                                                                                                                                                                                                                                                                                                                                                                                                           |                                                                                                                                                                                                                                                                                                                                                                                                                                                                                                                                                                                                                                                                                                         |                                                                                                                                                                                                                                                                                                                                                                                                                                                                                                                                                                                                                                                                                                                                                                                                                                                                                  |                                                                                                                                                                                                                                                                                                                                                                                                                                                                                                                                                                                                                                                                                                         |
| P2                                                                                                                                                                                                                                                                                                                                                                                                                                                                                                                                                                                                                                                                                                                 | <ul style="list-style-type: none"><li>Decrease in amplitude from wake to NREM-I [Webster and Colrain,1998 (135)]</li><li>Smaller P2 amplitude in wakefulness than during NREM-II [Gora <i>et al.</i>, 1999 (136)]</li></ul>                                                                                                                                                                                                                                                                                                                                                                                                                                                                                                                                                                                                                                                                                                                                                                                                                                                                                                                                                                                                                                                                                                                                                                                                                                                                                                                                                                                                                                                                                                                                                                                                                                                                                                                                                                                                                                                                                                                                                                                                                                                                                                                                                                                                                                                                                                                                                                                                                                                                                                                                                                                                                                                                                                                                                                                                                                                                                                                                                                                                                                                                                                                                                                                                                                                                                                                                                                                                                                                                                                                                                                                                                                                                                                                                                                                                                                                                                                                                                                                                                                                                                                                                                                                                                                                                                                                                                                                                                                                                                                                                                                                                                                                                                                                                                                                                                            |                                                                                                                                                                                                                                                                                                                                                                                                                                                                                                                                                                                                                                                                                                                                                                                                           |                                                                                                                                                                                                                                                                                                                                                                                                                                                                                                                                                                                                                                                                                                                                           |                                                                                                                                                                                                                                                                                                                                                                                                                                                                                                                                                                                                                                                                                                         |                                                                                                                                                                                                                                                                                                                                                                                                                                                                                                                                                                                                                                                                                                                                                                                                                                                                                  |                                                                                                                                                                                                                                                                                                                                                                                                                                                                                                                                                                                                                                                                                                         |
| N2                                                                                                                                                                                                                                                                                                                                                                                                                                                                                                                                                                                                                                                                                                                 | <ul style="list-style-type: none"><li>N350 occurs following respiratory occlusions during the transition to NREM-I-theta and may be related to VSW at SO [Gora <i>et al.</i>, 2001 (137)]</li><li>Dominant in NREM-II sleep [Webster and Colrain, 2000 (138)]</li></ul>                                                                                                                                                                                                                                                                                                                                                                                                                                                                                                                                                                                                                                                                                                                                                                                                                                                                                                                                                                                                                                                                                                                                                                                                                                                                                                                                                                                                                                                                                                                                                                                                                                                                                                                                                                                                                                                                                                                                                                                                                                                                                                                                                                                                                                                                                                                                                                                                                                                                                                                                                                                                                                                                                                                                                                                                                                                                                                                                                                                                                                                                                                                                                                                                                                                                                                                                                                                                                                                                                                                                                                                                                                                                                                                                                                                                                                                                                                                                                                                                                                                                                                                                                                                                                                                                                                                                                                                                                                                                                                                                                                                                                                                                                                                                                                                |                                                                                                                                                                                                                                                                                                                                                                                                                                                                                                                                                                                                                                                                                                                                                                                                           |                                                                                                                                                                                                                                                                                                                                                                                                                                                                                                                                                                                                                                                                                                                                           |                                                                                                                                                                                                                                                                                                                                                                                                                                                                                                                                                                                                                                                                                                         |                                                                                                                                                                                                                                                                                                                                                                                                                                                                                                                                                                                                                                                                                                                                                                                                                                                                                  |                                                                                                                                                                                                                                                                                                                                                                                                                                                                                                                                                                                                                                                                                                         |
| P3                                                                                                                                                                                                                                                                                                                                                                                                                                                                                                                                                                                                                                                                                                                 | <ul style="list-style-type: none"><li>A P300/P450 is automatically elicited by the occlusion of breathing [Webster and Colrain, 2000 (138)]</li><li>A dramatic difference between the NREM-I-alpha and -theta in the amplitude of P300 [Gora <i>et al.</i>, 1999 (136)]</li><li>A parieto-occipital maximum of P300 with little dispersion to frontal regions [Gora <i>et al.</i>, 1999 (136)]</li><li>A more posterior parieto-occipital distribution with decreased amplitude of this late positive wave during NREM-II [Gora <i>et al.</i>, 1999 (136)]</li></ul>                                                                                                                                                                                                                                                                                                                                                                                                                                                                                                                                                                                                                                                                                                                                                                                                                                                                                                                                                                                                                                                                                                                                                                                                                                                                                                                                                                                                                                                                                                                                                                                                                                                                                                                                                                                                                                                                                                                                                                                                                                                                                                                                                                                                                                                                                                                                                                                                                                                                                                                                                                                                                                                                                                                                                                                                                                                                                                                                                                                                                                                                                                                                                                                                                                                                                                                                                                                                                                                                                                                                                                                                                                                                                                                                                                                                                                                                                                                                                                                                                                                                                                                                                                                                                                                                                                                                                                                                                                                                                   |                                                                                                                                                                                                                                                                                                                                                                                                                                                                                                                                                                                                                                                                                                                                                                                                           |                                                                                                                                                                                                                                                                                                                                                                                                                                                                                                                                                                                                                                                                                                                                           |                                                                                                                                                                                                                                                                                                                                                                                                                                                                                                                                                                                                                                                                                                         |                                                                                                                                                                                                                                                                                                                                                                                                                                                                                                                                                                                                                                                                                                                                                                                                                                                                                  |                                                                                                                                                                                                                                                                                                                                                                                                                                                                                                                                                                                                                                                                                                         |
| N550                                                                                                                                                                                                                                                                                                                                                                                                                                                                                                                                                                                                                                                                                                               | <ul style="list-style-type: none"><li>N550 did not appear until NREM-II sleep associated with SO [Webster and Colrain, 2000 (138)]</li></ul>                                                                                                                                                                                                                                                                                                                                                                                                                                                                                                                                                                                                                                                                                                                                                                                                                                                                                                                                                                                                                                                                                                                                                                                                                                                                                                                                                                                                                                                                                                                                                                                                                                                                                                                                                                                                                                                                                                                                                                                                                                                                                                                                                                                                                                                                                                                                                                                                                                                                                                                                                                                                                                                                                                                                                                                                                                                                                                                                                                                                                                                                                                                                                                                                                                                                                                                                                                                                                                                                                                                                                                                                                                                                                                                                                                                                                                                                                                                                                                                                                                                                                                                                                                                                                                                                                                                                                                                                                                                                                                                                                                                                                                                                                                                                                                                                                                                                                                           |                                                                                                                                                                                                                                                                                                                                                                                                                                                                                                                                                                                                                                                                                                                                                                                                           |                                                                                                                                                                                                                                                                                                                                                                                                                                                                                                                                                                                                                                                                                                                                           |                                                                                                                                                                                                                                                                                                                                                                                                                                                                                                                                                                                                                                                                                                         |                                                                                                                                                                                                                                                                                                                                                                                                                                                                                                                                                                                                                                                                                                                                                                                                                                                                                  |                                                                                                                                                                                                                                                                                                                                                                                                                                                                                                                                                                                                                                                                                                         |
| P900                                                                                                                                                                                                                                                                                                                                                                                                                                                                                                                                                                                                                                                                                                               | <ul style="list-style-type: none"><li>Not assessed</li></ul>                                                                                                                                                                                                                                                                                                                                                                                                                                                                                                                                                                                                                                                                                                                                                                                                                                                                                                                                                                                                                                                                                                                                                                                                                                                                                                                                                                                                                                                                                                                                                                                                                                                                                                                                                                                                                                                                                                                                                                                                                                                                                                                                                                                                                                                                                                                                                                                                                                                                                                                                                                                                                                                                                                                                                                                                                                                                                                                                                                                                                                                                                                                                                                                                                                                                                                                                                                                                                                                                                                                                                                                                                                                                                                                                                                                                                                                                                                                                                                                                                                                                                                                                                                                                                                                                                                                                                                                                                                                                                                                                                                                                                                                                                                                                                                                                                                                                                                                                                                                           |                                                                                                                                                                                                                                                                                                                                                                                                                                                                                                                                                                                                                                                                                                                                                                                                           |                                                                                                                                                                                                                                                                                                                                                                                                                                                                                                                                                                                                                                                                                                                                           |                                                                                                                                                                                                                                                                                                                                                                                                                                                                                                                                                                                                                                                                                                         |                                                                                                                                                                                                                                                                                                                                                                                                                                                                                                                                                                                                                                                                                                                                                                                                                                                                                  |                                                                                                                                                                                                                                                                                                                                                                                                                                                                                                                                                                                                                                                                                                         |
| The mismatch negativity (MMN)                                                                                                                                                                                                                                                                                                                                                                                                                                                                                                                                                                                                                                                                                      | <ul style="list-style-type: none"><li>The MMN was still observed in NREM-I, but was significantly reduced in amplitude [Nittono <i>et al.</i>, 2001 (139); Sabri <i>et al.</i>, 2000 (140)] and could no longer be recorded after NREM-I-theta at SO [Nittono <i>et al.</i>, 2001 (139)]</li><li>The MMN was followed by a central maximum positivity, the P3a, peaking at approximately 250 ms [Sabri <i>et al.</i>, 2000 (140)]</li><li>MMN could no longer be observed during NREM-II associated with SO [Sabri <i>et al.</i>, 2000 (140)]</li><li>P240 and N360 (N2) emerged for high deviant tone [Nittono <i>et al.</i>, 2001 (139)]</li></ul>                                                                                                                                                                                                                                                                                                                                                                                                                                                                                                                                                                                                                                                                                                                                                                                                                                                                                                                                                                                                                                                                                                                                                                                                                                                                                                                                                                                                                                                                                                                                                                                                                                                                                                                                                                                                                                                                                                                                                                                                                                                                                                                                                                                                                                                                                                                                                                                                                                                                                                                                                                                                                                                                                                                                                                                                                                                                                                                                                                                                                                                                                                                                                                                                                                                                                                                                                                                                                                                                                                                                                                                                                                                                                                                                                                                                                                                                                                                                                                                                                                                                                                                                                                                                                                                                                                                                                                                                   |                                                                                                                                                                                                                                                                                                                                                                                                                                                                                                                                                                                                                                                                                                                                                                                                           |                                                                                                                                                                                                                                                                                                                                                                                                                                                                                                                                                                                                                                                                                                                                           |                                                                                                                                                                                                                                                                                                                                                                                                                                                                                                                                                                                                                                                                                                         |                                                                                                                                                                                                                                                                                                                                                                                                                                                                                                                                                                                                                                                                                                                                                                                                                                                                                  |                                                                                                                                                                                                                                                                                                                                                                                                                                                                                                                                                                                                                                                                                                         |
| Intracerebral EEG recordings                                                                                                                                                                                                                                                                                                                                                                                                                                                                                                                                                                                                                                                                                       |                                                                                                                                                                                                                                                                                                                                                                                                                                                                                                                                                                                                                                                                                                                                                                                                                                                                                                                                                                                                                                                                                                                                                                                                                                                                                                                                                                                                                                                                                                                                                                                                                                                                                                                                                                                                                                                                                                                                                                                                                                                                                                                                                                                                                                                                                                                                                                                                                                                                                                                                                                                                                                                                                                                                                                                                                                                                                                                                                                                                                                                                                                                                                                                                                                                                                                                                                                                                                                                                                                                                                                                                                                                                                                                                                                                                                                                                                                                                                                                                                                                                                                                                                                                                                                                                                                                                                                                                                                                                                                                                                                                                                                                                                                                                                                                                                                                                                                                                                                                                                                                        |                                                                                                                                                                                                                                                                                                                                                                                                                                                                                                                                                                                                                                                                                                                                                                                                           |                                                                                                                                                                                                                                                                                                                                                                                                                                                                                                                                                                                                                                                                                                                                           |                                                                                                                                                                                                                                                                                                                                                                                                                                                                                                                                                                                                                                                                                                         |                                                                                                                                                                                                                                                                                                                                                                                                                                                                                                                                                                                                                                                                                                                                                                                                                                                                                  |                                                                                                                                                                                                                                                                                                                                                                                                                                                                                                                                                                                                                                                                                                         |
| Stereo-EEG (SEEG) recordings                                                                                                                                                                                                                                                                                                                                                                                                                                                                                                                                                                                                                                                                                       | <ul style="list-style-type: none"><li>The thalamic [Magnin <i>et al.</i>, 2010 (74); Sarasso <i>et al.</i>, 2014 (141)] and hippocampal deactivation at SO precede that of the cortex by several minutes in contrast to the synchronous reactivation of both structures during wakefulness [Sarasso <i>et al.</i>, 2014 (141)]</li><li>Heterogeneity in the delays between the thalamus and cortex deactivation from one subject to another [Magnin <i>et al.</i>, 2010 (74)]</li><li>The occurrence of hippocampal spindles several minutes SO preceded neocortical events, with increasing delays along the cortical antero-posterior axis [Sarasso <i>et al.</i>, 2014 (141)]</li><li>The calcarine cortex is dominated by the theta oscillations at SO [Marzano <i>et al.</i>, 2013 (47)]</li><li>An increase in REM-like 1.5–3.0 Hz parahippocampal activity during wake-sleep transition, peaking following on average 30 s of SO, and reaching 82% of REM sleep value [Bódizs <i>et al.</i>, 2005 (106)]</li><li>The increase in 1.5–3.0 Hz parahippocampal activity followed alpha dropout, but did not relate to short-term fluctuations in alpha waves or sleep spindles [Bódizs <i>et al.</i>, 2005 (106)]</li><li>Non-REM sleep-specific slow (&lt;1.25 Hz) activity showed a continuous increase during wake-sleep transition in both temporal scalp and parahippocampal recordings [Bódizs <i>et al.</i>, 2005 (106)]</li></ul>                                                                                                                                                                                                                                                                                                                                                                                                                                                                                                                                                                                                                                                                                                                                                                                                                                                                                                                                                                                                                                                                                                                                                                                                                                                                                                                                                                                                                                                                                                                                                                                                                                                                                                                                                                                                                                                                                                                                                                                                                                                                                                                                                                                                                                                                                                                                                                                                                                                                                                                                                                                                                                                                                                                                                                                                                                                                                                                                                                                                                                                                                                                                                                                                                                                                                                                                                                                                                                                                                                                                                                                                          | <strong>Strengths:</strong> <ul style="list-style-type: none"><li>Non-invasive</li><li>High temporal resolution enabling the examination of rhythmic, oscillatory neural activity in different frequency bands</li><li>Well suited to examine the subtle dynamics of cortical processes as they unfold spontaneously in resting state</li><li>Better spatial resolution compared with EEG</li><li>Measures resting-state and task-based functional connectivity</li></ul> <strong>Limitations:</strong> <ul style="list-style-type: none"><li>Expensive</li><li>Does not provide structural information</li><li>Neuromagnetic signals are weak and difficult to measure</li></ul>                                                                                                                         |                                                                                                                                                                                                                                                                                                                                                                                                                                                                                                                                                                                                                                                                                                                                           |                                                                                                                                                                                                                                                                                                                                                                                                                                                                                                                                                                                                                                                                                                         |                                                                                                                                                                                                                                                                                                                                                                                                                                                                                                                                                                                                                                                                                                                                                                                                                                                                                  |                                                                                                                                                                                                                                                                                                                                                                                                                                                                                                                                                                                                                                                                                                         |
| Neuroimaging methods                                                                                                                                                                                                                                                                                                                                                                                                                                                                                                                                                                                                                                                                                               |                                                                                                                                                                                                                                                                                                                                                                                                                                                                                                                                                                                                                                                                                                                                                                                                                                                                                                                                                                                                                                                                                                                                                                                                                                                                                                                                                                                                                                                                                                                                                                                                                                                                                                                                                                                                                                                                                                                                                                                                                                                                                                                                                                                                                                                                                                                                                                                                                                                                                                                                                                                                                                                                                                                                                                                                                                                                                                                                                                                                                                                                                                                                                                                                                                                                                                                                                                                                                                                                                                                                                                                                                                                                                                                                                                                                                                                                                                                                                                                                                                                                                                                                                                                                                                                                                                                                                                                                                                                                                                                                                                                                                                                                                                                                                                                                                                                                                                                                                                                                                                                        |                                                                                                                                                                                                                                                                                                                                                                                                                                                                                                                                                                                                                                                                                                                                                                                                           |                                                                                                                                                                                                                                                                                                                                                                                                                                                                                                                                                                                                                                                                                                                                           |                                                                                                                                                                                                                                                                                                                                                                                                                                                                                                                                                                                                                                                                                                         |                                                                                                                                                                                                                                                                                                                                                                                                                                                                                                                                                                                                                                                                                                                                                                                                                                                                                  |                                                                                                                                                                                                                                                                                                                                                                                                                                                                                                                                                                                                                                                                                                         |
| Magnetoencephalography (MEG)                                                                                                                                                                                                                                                                                                                                                                                                                                                                                                                                                                                                                                                                                       | <ul style="list-style-type: none"><li>Significant decrease of alpha spectral power and higher frequencies in posterior parietal cortex with the active inhibition in the frontal lobe leading to an increase in delta and theta power during SOP [Ioannides <i>et al.</i>, 2017 (75)]</li><li>Changes identified in NREM-I become more widespread during NREM-II associated with SO in addition to focal increases in alpha and low sigma band power in frontal midline cortical structures [Ioannides <i>et al.</i>, 2017 (75)]</li><li>Local spectral power alterations in pre-frontal cortex, mid-cingulate, the rostral and subgenual anterior cingulate just prior to the emergence of spindles and KCs [Ioannides <i>et al.</i>, 2017 (75)]</li><li>Using a 5-second epoch classification, stable non-responsiveness is only manifest few minutes after the emergence of the first spindles [Strauss <i>et al.</i>, 2022 (113)]</li><li>The global P300 was only present in responsive trials, regardless of vigilance states [Strauss <i>et al.</i>, 2022 (113)]</li></ul>                                                                                                                                                                                                                                                                                                                                                                                                                                                                                                                                                                                                                                                                                                                                                                                                                                                                                                                                                                                                                                                                                                                                                                                                                                                                                                                                                                                                                                                                                                                                                                                                                                                                                                                                                                                                                                                                                                                                                                                                                                                                                                                                                                                                                                                                                                                                                                                                                                                                                                                                                                                                                                                                                                                                                                                                                                                                                                                                                                                                                                                                                                                                                                                                                                                                                                                                                                                                                                                                                                                                                                                                                                                                                                                                                                                                                                                                                                                                                                      |                                                                                                                                                                                                                                                                                                                                                                                                                                                                                                                                                                                                                                                                                                                                                                                                           | <strong>Strengths:</strong> <ul style="list-style-type: none"><li>Non-invasive;</li><li>High spatial resolution</li><li>Whole brain coverage including sub-cortical regions providing both structural and functional information</li><li>Measures resting-state and task-based functional connectivity</li><li>Highly reproducible and reliable;</li><li>Easy to acquire in clinical settings</li></ul> <strong>Limitations:</strong> <ul style="list-style-type: none"><li>Discomfort of scanning environment</li><li>Loud acoustic noise</li><li>Susceptible to motion artifacts</li><li>Moderately expensive</li><li>Merely reflect changes of de-oxyhemoglobin concentrations providing indirect measure of neural activity</li></ul> |                                                                                                                                                                                                                                                                                                                                                                                                                                                                                                                                                                                                                                                                                                         |                                                                                                                                                                                                                                                                                                                                                                                                                                                                                                                                                                                                                                                                                                                                                                                                                                                                                  |                                                                                                                                                                                                                                                                                                                                                                                                                                                                                                                                                                                                                                                                                                         |
| Functional magnetic resonance imaging (fMRI)                                                                                                                                                                                                                                                                                                                                                                                                                                                                                                                                                                                                                                                                       |                                                                                                                                                                                                                                                                                                                                                                                                                                                                                                                                                                                                                                                                                                                                                                                                                                                                                                                                                                                                                                                                                                                                                                                                                                                                                                                                                                                                                                                                                                                                                                                                                                                                                                                                                                                                                                                                                                                                                                                                                                                                                                                                                                                                                                                                                                                                                                                                                                                                                                                                                                                                                                                                                                                                                                                                                                                                                                                                                                                                                                                                                                                                                                                                                                                                                                                                                                                                                                                                                                                                                                                                                                                                                                                                                                                                                                                                                                                                                                                                                                                                                                                                                                                                                                                                                                                                                                                                                                                                                                                                                                                                                                                                                                                                                                                                                                                                                                                                                                                                                                                        |                                                                                                                                                                                                                                                                                                                                                                                                                                                                                                                                                                                                                                                                                                                                                                                                           |                                                                                                                                                                                                                                                                                                                                                                                                                                                                                                                                                                                                                                                                                                                                           |                                                                                                                                                                                                                                                                                                                                                                                                                                                                                                                                                                                                                                                                                                         |                                                                                                                                                                                                                                                                                                                                                                                                                                                                                                                                                                                                                                                                                                                                                                                                                                                                                  |                                                                                                                                                                                                                                                                                                                                                                                                                                                                                                                                                                                                                                                                                                         |
|                                                                                                                                                                                                                                                                                                                                                                                                                                                                                                                                                                                                                                                                                                                    | <ul style="list-style-type: none"><li>Significantly higher intra-hemispheric thalamic FC in idiopathic generalised epilepsy [IGE] patients than controls following SO [Bagshaw <i>et al.</i>, 2017 (77)]</li><li>Increased FC in thalamic regions that were predominantly functionally connected to somatomotor and occipital neocortices in healthy controls during SO [Bagshaw <i>et al.</i>, 2017 (77)]</li><li>FC alterations pertaining to the disorder always involving somatomotor and occipital regions at SO [Bagshaw <i>et al.</i>, 2017 (77)]</li><li>Altered thalamocortical functional connectivity. Both intra- and inter-hemispheric thalamic connectivity measured from functionally defined thalamic subdivisions became more consolidated with progression into sleep with the largest increases observed during NREM-II in in sensorimotor cortices [Hale <i>et al.</i>, 2016 (76)]</li></ul>                                                                                                                                                                                                                                                                                                                                                                                                                                                                                                                                                                                                                                                                                                                                                                                                                                                                                                                                                                                                                                                                                                                                                                                                                                                                                                                                                                                                                                                                                                                                                                                                                                                                                                                                                                                                                                                                                                                                                                                                                                                                                                                                                                                                                                                                                                                                                                                                                                                                                                                                                                                                                                                                                                                                                                                                                                                                                                                                                                                                                                                                                                                                                                                                                                                                                                                                                                                                                                                                                                                                                                                                                                                                                                                                                                                                                                                                                                                                                                                                                                                                                                                                       |                                                                                                                                                                                                                                                                                                                                                                                                                                                                                                                                                                                                                                                                                                                                                                                                           |                                                                                                                                                                                                                                                                                                                                                                                                                                                                                                                                                                                                                                                                                                                                           | <strong>Strengths:</strong> <ul style="list-style-type: none"><li>Both anatomical and functional information can be obtained</li><li>high spatial resolution</li><li>Less sensitive to motion artifacts</li></ul> <strong>Limitations:</strong> <ul style="list-style-type: none"><li>Expensive</li><li>Invasive (request inject radioactive tracer)</li><li>Low temporal resolution</li></ul>                                                                                                                                                                                                                                                                                                          |                                                                                                                                                                                                                                                                                                                                                                                                                                                                                                                                                                                                                                                                                                                                                                                                                                                                                  |                                                                                                                                                                                                                                                                                                                                                                                                                                                                                                                                                                                                                                                                                                         |
| Positron emission tomography (PET)                                                                                                                                                                                                                                                                                                                                                                                                                                                                                                                                                                                                                                                                                 |                                                                                                                                                                                                                                                                                                                                                                                                                                                                                                                                                                                                                                                                                                                                                                                                                                                                                                                                                                                                                                                                                                                                                                                                                                                                                                                                                                                                                                                                                                                                                                                                                                                                                                                                                                                                                                                                                                                                                                                                                                                                                                                                                                                                                                                                                                                                                                                                                                                                                                                                                                                                                                                                                                                                                                                                                                                                                                                                                                                                                                                                                                                                                                                                                                                                                                                                                                                                                                                                                                                                                                                                                                                                                                                                                                                                                                                                                                                                                                                                                                                                                                                                                                                                                                                                                                                                                                                                                                                                                                                                                                                                                                                                                                                                                                                                                                                                                                                                                                                                                                                        |                                                                                                                                                                                                                                                                                                                                                                                                                                                                                                                                                                                                                                                                                                                                                                                                           |                                                                                                                                                                                                                                                                                                                                                                                                                                                                                                                                                                                                                                                                                                                                           |                                                                                                                                                                                                                                                                                                                                                                                                                                                                                                                                                                                                                                                                                                         |                                                                                                                                                                                                                                                                                                                                                                                                                                                                                                                                                                                                                                                                                                                                                                                                                                                                                  |                                                                                                                                                                                                                                                                                                                                                                                                                                                                                                                                                                                                                                                                                                         |
|                                                                                                                                                                                                                                                                                                                                                                                                                                                                                                                                                                                                                                                                                                                    | <ul style="list-style-type: none"><li>Reduced activity in the dorsolateral prefrontal and lateral orbital areas corresponded with decreased activity in the dorsomedial nucleus of the thalamus [Braun <i>et al.</i>, 1997 (78)]</li><li>Deactivation of sensory nuclei of the in the absence of reduction in post-rolandic sensory cortices activity level [Braun <i>et al.</i>, 1997 (78)]</li></ul>                                                                                                                                                                                                                                                                                                                                                                                                                                                                                                                                                                                                                                                                                                                                                                                                                                                                                                                                                                                                                                                                                                                                                                                                                                                                                                                                                                                                                                                                                                                                                                                                                                                                                                                                                                                                                                                                                                                                                                                                                                                                                                                                                                                                                                                                                                                                                                                                                                                                                                                                                                                                                                                                                                                                                                                                                                                                                                                                                                                                                                                                                                                                                                                                                                                                                                                                                                                                                                                                                                                                                                                                                                                                                                                                                                                                                                                                                                                                                                                                                                                                                                                                                                                                                                                                                                                                                                                                                                                                                                                                                                                                                                                 |                                                                                                                                                                                                                                                                                                                                                                                                                                                                                                                                                                                                                                                                                                                                                                                                           |                                                                                                                                                                                                                                                                                                                                                                                                                                                                                                                                                                                                                                                                                                                                           |                                                                                                                                                                                                                                                                                                                                                                                                                                                                                                                                                                                                                                                                                                         | <strong>Strengths:</strong> <ul style="list-style-type: none"><li>Non-invasive</li><li>Compatible with other modalities due to the absence of electro-optical interference</li><li>Safe and easy to set up</li><li>Provide changes in oxy- and deoxyhemoglobin concentrations</li><li>It allows for measurement of specific biochemical markers, cerebrovascular autonomic regulation and for localization response of approximately 1 s or less.</li></ul> <strong>Limitations:</strong> <ul style="list-style-type: none"><li>Merely cerebral cortex instead of deep structure</li><li>Contaminated by the extracerebral hemodynamics</li></ul> <ul style="list-style-type: none"><li>TDC- high temporal resolution</li><li>Non-invasive</li><li>Continuous long- term recording during an entire sleep period and simultaneous registration of associated variables</li></ul> |                                                                                                                                                                                                                                                                                                                                                                                                                                                                                                                                                                                                                                                                                                         |
| Functional near-infrared spectroscopy                                                                                                                                                                                                                                                                                                                                                                                                                                                                                                                                                                                                                                                                              |                                                                                                                                                                                                                                                                                                                                                                                                                                                                                                                                                                                                                                                                                                                                                                                                                                                                                                                                                                                                                                                                                                                                                                                                                                                                                                                                                                                                                                                                                                                                                                                                                                                                                                                                                                                                                                                                                                                                                                                                                                                                                                                                                                                                                                                                                                                                                                                                                                                                                                                                                                                                                                                                                                                                                                                                                                                                                                                                                                                                                                                                                                                                                                                                                                                                                                                                                                                                                                                                                                                                                                                                                                                                                                                                                                                                                                                                                                                                                                                                                                                                                                                                                                                                                                                                                                                                                                                                                                                                                                                                                                                                                                                                                                                                                                                                                                                                                                                                                                                                                                                        |                                                                                                                                                                                                                                                                                                                                                                                                                                                                                                                                                                                                                                                                                                                                                                                                           |                                                                                                                                                                                                                                                                                                                                                                                                                                                                                                                                                                                                                                                                                                                                           |                                                                                                                                                                                                                                                                                                                                                                                                                                                                                                                                                                                                                                                                                                         |                                                                                                                                                                                                                                                                                                                                                                                                                                                                                                                                                                                                                                                                                                                                                                                                                                                                                  |                                                                                                                                                                                                                                                                                                                                                                                                                                                                                                                                                                                                                                                                                                         |
|                                                                                                                                                                                                                                                                                                                                                                                                                                                                                                                                                                                                                                                                                                                    | <ul style="list-style-type: none"><li>Decreased in oxy-Hb and increase in deoxy-Hb [Hoshi <i>et al.</i>, 1994 (79); Näsi <i>et al.</i>, 2011 (80); Shiotsuk <i>et al.</i>, 1998 (81); Zhang and Khatami , 2015 (82)] coupled with decreased peripheral arterial oxygen saturation [SpO<sub>2</sub>] and HR[Näsi <i>et al.</i>, 2011 (80)]</li><li>SO was associated with initial decrease of brain perfusion marked with decreased BV and oxy-Hb together with increased muscular BV and deoxy-Hb [Zhang and Khatami, 2015 (82)]</li><li>Decreased oxy-Hb and decreased deoxy-Hb during SO [Spielman <i>et al.</i>, 2000 (83)]</li></ul>                                                                                                                                                                                                                                                                                                                                                                                                                                                                                                                                                                                                                                                                                                                                                                                                                                                                                                                                                                                                                                                                                                                                                                                                                                                                                                                                                                                                                                                                                                                                                                                                                                                                                                                                                                                                                                                                                                                                                                                                                                                                                                                                                                                                                                                                                                                                                                                                                                                                                                                                                                                                                                                                                                                                                                                                                                                                                                                                                                                                                                                                                                                                                                                                                                                                                                                                                                                                                                                                                                                                                                                                                                                                                                                                                                                                                                                                                                                                                                                                                                                                                                                                                                                                                                                                                                                                                                                                               |                                                                                                                                                                                                                                                                                                                                                                                                                                                                                                                                                                                                                                                                                                                                                                                                           |                                                                                                                                                                                                                                                                                                                                                                                                                                                                                                                                                                                                                                                                                                                                           |                                                                                                                                                                                                                                                                                                                                                                                                                                                                                                                                                                                                                                                                                                         |                                                                                                                                                                                                                                                                                                                                                                                                                                                                                                                                                                                                                                                                                                                                                                                                                                                                                  | <strong>Strengths:</strong> <ul style="list-style-type: none"><li>Great adjunct to other neuroimaging or electrophysiological measurements</li><li>Easy to implement</li><li>High temporal resolution for physiological measurements</li><li>Behavioural measures allow for information regarding overt cognitive processing to be obtained.</li></ul> <strong>Limitations:</strong> <ul style="list-style-type: none"><li>Great interindividual variability</li><li>Less accurate temporal correspondence between behavioural and electrophysiological measures underestimating SO</li><li>Needs systematic investigations as it is variable with time and in association with other factors</li></ul> |
| Transcranial doppler ultrasound                                                                                                                                                                                                                                                                                                                                                                                                                                                                                                                                                                                                                                                                                    |                                                                                                                                                                                                                                                                                                                                                                                                                                                                                                                                                                                                                                                                                                                                                                                                                                                                                                                                                                                                                                                                                                                                                                                                                                                                                                                                                                                                                                                                                                                                                                                                                                                                                                                                                                                                                                                                                                                                                                                                                                                                                                                                                                                                                                                                                                                                                                                                                                                                                                                                                                                                                                                                                                                                                                                                                                                                                                                                                                                                                                                                                                                                                                                                                                                                                                                                                                                                                                                                                                                                                                                                                                                                                                                                                                                                                                                                                                                                                                                                                                                                                                                                                                                                                                                                                                                                                                                                                                                                                                                                                                                                                                                                                                                                                                                                                                                                                                                                                                                                                                                        |                                                                                                                                                                                                                                                                                                                                                                                                                                                                                                                                                                                                                                                                                                                                                                                                           |                                                                                                                                                                                                                                                                                                                                                                                                                                                                                                                                                                                                                                                                                                                                           |                                                                                                                                                                                                                                                                                                                                                                                                                                                                                                                                                                                                                                                                                                         |                                                                                                                                                                                                                                                                                                                                                                                                                                                                                                                                                                                                                                                                                                                                                                                                                                                                                  |                                                                                                                                                                                                                                                                                                                                                                                                                                                                                                                                                                                                                                                                                                         |
|                                                                                                                                                                                                                                                                                                                                                                                                                                                                                                                                                                                                                                                                                                                    | <ul style="list-style-type: none"><li>Marked changes in CBF velocity during SO: increases with the transition from wakefulness to sleep [alpha-theta] and decreases with awakening from sleep [Klingelhöfer <i>et al.</i>, 1995 (142); Kotajima <i>et al.</i>, 2005 (143); Kuboyama <i>et al.</i>, 1997 (144)]</li><li>Lower CBF associated with stable non-REM sleep [SO] than wakefulness that reduces progressively as sleep stages become deeper [Hajak <i>et al.</i>, 1994 (145); Kotajima, <i>et al.</i>, 2005 (143); Kuboyama <i>et al.</i>, 1997 (144)]</li><li>A fall in mean flow velocity below the waking level during sleep NREM-II following SO [Hajak <i>et al.</i>, 1994 (145); Klingelhöfer <i>et al.</i>, 1995 (142)]</li><li>Higher flow patterns during sleep NREM-II following SO compared with CBF values after transition from SWS to sleep NREM-II [Hajak <i>et al.</i>, 1994 (145)]</li></ul>                                                                                                                                                                                                                                                                                                                                                                                                                                                                                                                                                                                                                                                                                                                                                                                                                                                                                                                                                                                                                                                                                                                                                                                                                                                                                                                                                                                                                                                                                                                                                                                                                                                                                                                                                                                                                                                                                                                                                                                                                                                                                                                                                                                                                                                                                                                                                                                                                                                                                                                                                                                                                                                                                                                                                                                                                                                                                                                                                                                                                                                                                                                                                                                                                                                                                                                                                                                                                                                                                                                                                                                                                                                                                                                                                                                                                                                                                                                                                                                                                                                                                                                                 | <strong>Strengths:</strong> <ul style="list-style-type: none"><li>Great adjunct to other neuroimaging or electrophysiological measurements</li><li>Easy to implement</li><li>High temporal resolution for physiological measurements</li><li>Behavioural measures allow for information regarding overt cognitive processing to be obtained.</li></ul> <strong>Limitations:</strong> <ul style="list-style-type: none"><li>Great interindividual variability</li><li>Less accurate temporal correspondence between behavioural and electrophysiological measures underestimating SO</li><li>Needs systematic investigations as it is variable with time and in association with other factors</li></ul>                                                                                                   |                                                                                                                                                                                                                                                                                                                                                                                                                                                                                                                                                                                                                                                                                                                                           |                                                                                                                                                                                                                                                                                                                                                                                                                                                                                                                                                                                                                                                                                                         |                                                                                                                                                                                                                                                                                                                                                                                                                                                                                                                                                                                                                                                                                                                                                                                                                                                                                  |                                                                                                                                                                                                                                                                                                                                                                                                                                                                                                                                                                                                                                                                                                         |
| Xenon 133 inhalation                                                                                                                                                                                                                                                                                                                                                                                                                                                                                                                                                                                                                                                                                               |                                                                                                                                                                                                                                                                                                                                                                                                                                                                                                                                                                                                                                                                                                                                                                                                                                                                                                                                                                                                                                                                                                                                                                                                                                                                                                                                                                                                                                                                                                                                                                                                                                                                                                                                                                                                                                                                                                                                                                                                                                                                                                                                                                                                                                                                                                                                                                                                                                                                                                                                                                                                                                                                                                                                                                                                                                                                                                                                                                                                                                                                                                                                                                                                                                                                                                                                                                                                                                                                                                                                                                                                                                                                                                                                                                                                                                                                                                                                                                                                                                                                                                                                                                                                                                                                                                                                                                                                                                                                                                                                                                                                                                                                                                                                                                                                                                                                                                                                                                                                                                                        |                                                                                                                                                                                                                                                                                                                                                                                                                                                                                                                                                                                                                                                                                                                                                                                                           |                                                                                                                                                                                                                                                                                                                                                                                                                                                                                                                                                                                                                                                                                                                                           |                                                                                                                                                                                                                                                                                                                                                                                                                                                                                                                                                                                                                                                                                                         |                                                                                                                                                                                                                                                                                                                                                                                                                                                                                                                                                                                                                                                                                                                                                                                                                                                                                  |                                                                                                                                                                                                                                                                                                                                                                                                                                                                                                                                                                                                                                                                                                         |
|                                                                                                                                                                                                                                                                                                                                                                                                                                                                                                                                                                                                                                                                                                                    | <ul style="list-style-type: none"><li>Significantly decreased fast flow values with its most prominent change in the brainstem-cerebellar regions [Sakai <i>et al.</i>, 1980 (146)]</li><li>Higher hemispheric values during NREM-IIa compared with that of NREM-II following SWS [Sakai <i>et al.</i>, 1980 (146)]</li></ul>                                                                                                                                                                                                                                                                                                                                                                                                                                                                                                                                                                                                                                                                                                                                                                                                                                                                                                                                                                                                                                                                                                                                                                                                                                                                                                                                                                                                                                                                                                                                                                                                                                                                                                                                                                                                                                                                                                                                                                                                                                                                                                                                                                                                                                                                                                                                                                                                                                                                                                                                                                                                                                                                                                                                                                                                                                                                                                                                                                                                                                                                                                                                                                                                                                                                                                                                                                                                                                                                                                                                                                                                                                                                                                                                                                                                                                                                                                                                                                                                                                                                                                                                                                                                                                                                                                                                                                                                                                                                                                                                                                                                                                                                                                                          |                                                                                                                                                                                                                                                                                                                                                                                                                                                                                                                                                                                                                                                                                                                                                                                                           | <strong>Strengths:</strong> <ul style="list-style-type: none"><li>Great adjunct to other neuroimaging or electrophysiological measurements</li><li>Easy to implement</li><li>High temporal resolution for physiological measurements</li><li>Behavioural measures allow for information regarding overt cognitive processing to be obtained.</li></ul> <strong>Limitations:</strong> <ul style="list-style-type: none"><li>Great interindividual variability</li><li>Less accurate temporal correspondence between behavioural and electrophysiological measures underestimating SO</li><li>Needs systematic investigations as it is variable with time and in association with other factors</li></ul>                                   |                                                                                                                                                                                                                                                                                                                                                                                                                                                                                                                                                                                                                                                                                                         |                                                                                                                                                                                                                                                                                                                                                                                                                                                                                                                                                                                                                                                                                                                                                                                                                                                                                  |                                                                                                                                                                                                                                                                                                                                                                                                                                                                                                                                                                                                                                                                                                         |
| Physiological and behavioural measurements                                                                                                                                                                                                                                                                                                                                                                                                                                                                                                                                                                                                                                                                         |                                                                                                                                                                                                                                                                                                                                                                                                                                                                                                                                                                                                                                                                                                                                                                                                                                                                                                                                                                                                                                                                                                                                                                                                                                                                                                                                                                                                                                                                                                                                                                                                                                                                                                                                                                                                                                                                                                                                                                                                                                                                                                                                                                                                                                                                                                                                                                                                                                                                                                                                                                                                                                                                                                                                                                                                                                                                                                                                                                                                                                                                                                                                                                                                                                                                                                                                                                                                                                                                                                                                                                                                                                                                                                                                                                                                                                                                                                                                                                                                                                                                                                                                                                                                                                                                                                                                                                                                                                                                                                                                                                                                                                                                                                                                                                                                                                                                                                                                                                                                                                                        |                                                                                                                                                                                                                                                                                                                                                                                                                                                                                                                                                                                                                                                                                                                                                                                                           |                                                                                                                                                                                                                                                                                                                                                                                                                                                                                                                                                                                                                                                                                                                                           |                                                                                                                                                                                                                                                                                                                                                                                                                                                                                                                                                                                                                                                                                                         |                                                                                                                                                                                                                                                                                                                                                                                                                                                                                                                                                                                                                                                                                                                                                                                                                                                                                  |                                                                                                                                                                                                                                                                                                                                                                                                                                                                                                                                                                                                                                                                                                         |
| Cardiovascular and respiratory activities                                                                                                                                                                                                                                                                                                                                                                                                                                                                                                                                                                                                                                                                          | <ul style="list-style-type: none"><li>Ventilation decreases with the alpha-theta transition and increases with the theta-alpha transition [Burgess <i>et al.</i>, 1999 (95); Colrain <i>et al.</i>, 1987 (147); Shinar <i>et al.</i>, 2006 (96); Trinder <i>et al.</i>, 1992 (148)] with the magnitude of change associated with positive function of metabolic drive at time of the state change [Trinder <i>et al.</i>, 1992 (148)]</li><li>Rising airway resistance during SO [Kay <i>et al.</i>, 1994 (91)] with the compensation reflex responses being lost during SOP [Gora <i>et al.</i>, 1998 (149)]</li><li>Positive relationship between ventilation and level of arousal during periods of unstable ventilation in young healthy adults [Trinder <i>et al.</i>, 1997 (150)]</li><li>Greater amplification of state-related ventilatory fluctuations in individuals with higher peripheral chemoreceptor drive [Dunai <i>et al.</i>, 1999 (151)]</li><li>The arterial baroreflex has a marked influence on the heart beat interval (HBI) control at SO with a positive correlation between fluctuations of BP and those of subsequent HBI after SO [Hwang <i>et al.</i>, 2013 (152)]</li><li>Substantial falls in BP and HR before the initial onset of theta activity and again after the attainment of stable sleep following the cessation of spontaneous arousals [Burgress <i>et al.</i>, 1999 (95); Carrington <i>et al.</i>, 2005 (153); Shinar <i>et al.</i>, 2006 (96)]</li><li>Decreased BP and sympathovagal balance shift towards increased vagal activity, in close association with SO [Burgess <i>et al.</i>, 1997; 1999 (95); Carrington <i>et al.</i>, 2003 (98)]</li><li>No significant change in respiratory sinus arrhythmia (RSA), pre-ejection period (PEP), and T-wave amplitude (TWA) is detected with the attainment of stable NREM-II sleep during SO [Burgess <i>et al.</i>, 1999 (95)]</li><li>The fall of both BP and HR was retarded between the intervening phases of 3 (NREM I-II) and 4 (NREM II to the last microarousal prior to stable sleep) [Carrington <i>et al.</i>, 2005 (153)]</li><li>Both the rate and magnitude of the BP decline were negatively associated with the number of arousals during these intermittent phases [Carrington <i>et al.</i>, 2005 (153)]</li><li>Significant correlations between alpha level and changes in peripheral physiological variables in the vicinity of sustained alpha losses in high-alpha subjects [Perry &amp; Goldwater, 1987 (94)]</li><li>A greater incidence of greater CO<sub>2</sub> tension in NREM-I and II on days 2 and 3 [Naifeh &amp; Kamiya, 1981 (93)], in addition to lower abdominal breathing amplitude, and a higher thoracic:abdominal breathing ratio during SO [Naifeh &amp; Kamiya, 1981 (93); Perry &amp; Goldwater, 1987 (94)]</li><li>A significant decline in very low-frequency power before SO [Okamoto-Mizuno <i>et al.</i>, 2008 (154); Shinar <i>et al.</i>, 2006 (96)]; normalized LF [LF/(LF + HF)], and body temperature prior to SO both in the time course of the SO and in the consecutive phases [Okamoto-Mizuno <i>et al.</i>, 2008 (154); Shinar <i>et al.</i>, 2006 (96)]; decreased LF power and the absence of significant change in HF (based on HRV-power spectrum) [Shinar <i>et al.</i>, 2006 (96)] reflecting a shift towards parasympathetic predominance</li><li>Significantly higher normalised spectral power in LF bands following SO in participants with long SOL compared with participants with short SOL [Nano <i>et al.</i>, 2020 (155)]</li><li>Significantly lower normalised spectral power in HF band in individuals with long SOL, compared with individuals with short SOL, over three time periods (first 10 min intending to sleep, 10 mins prior to SO and 10 min after SO) [Nano <i>et al.</i>, 2020 (155)]</li><li>At alpha-theta transitions, phasic activity of diaphragm, intercostal, and genioglossus (GG) muscles fell and rose again, and phasic and tonic activities of tensor palatini (TP) fell and remained at low levels during theta stage [Worsnop <i>et al.</i>, 1998 (92)]</li><li>Approximately 50% of GG inspiratory units (phasic and tonic) ceased activity at SO, with the rest of the active inspiratory units showing a reduction in the proportion of each breath [Wilkinson <i>et al.</i>, 2008 (156)]</li><li>Tonic and expiratory units unaffected by SO, maintaining their discharge pattern over the alpha-theta transition [Wilkinson <i>et al.</i>, 2008 (156)]</li><li>A greater active proportion of expiratory modulated motor units in TP at SO [Nicholas <i>et al.</i>, 2012 (157)]</li><li>The expiratory units, along with inspiratory units, tended to become silent over SO suggesting that both expiratory and inspiratory drive components are reduced at SO in TP [Nicholas <i>et al.</i>, 2012 (157)]</li><li>No systematic reduction in the GG reflex to negative pressure at sleep onset [Shea <i>et al.</i>, 1999 (158)]</li></ul> |                                                                                                                                                                                                                                                                                                                                                                                                                                                                                                                                                                                                                                                                                                                                                                                                           |                                                                                                                                                                                                                                                                                                                                                                                                                                                                                                                                                                                                                                                                                                                                           | <strong>Strengths:</strong> <ul style="list-style-type: none"><li>Great adjunct to other neuroimaging or electrophysiological measurements</li><li>Easy to implement</li><li>High temporal resolution for physiological measurements</li><li>Behavioural measures allow for information regarding overt cognitive processing to be obtained.</li></ul> <strong>Limitations:</strong> <ul style="list-style-type: none"><li>Great interindividual variability</li><li>Less accurate temporal correspondence between behavioural and electrophysiological measures underestimating SO</li><li>Needs systematic investigations as it is variable with time and in association with other factors</li></ul> |                                                                                                                                                                                                                                                                                                                                                                                                                                                                                                                                                                                                                                                                                                                                                                                                                                                                                  |                                                                                                                                                                                                                                                                                                                                                                                                                                                                                                                                                                                                                                                                                                         |
| Oculomotor activities                                                                                                                                                                                                                                                                                                                                                                                                                                                                                                                                                                                                                                                                                              |                                                                                                                                                                                                                                                                                                                                                                                                                                                                                                                                                                                                                                                                                                                                                                                                                                                                                                                                                                                                                                                                                                                                                                                                                                                                                                                                                                                                                                                                                                                                                                                                                                                                                                                                                                                                                                                                                                                                                                                                                                                                                                                                                                                                                                                                                                                                                                                                                                                                                                                                                                                                                                                                                                                                                                                                                                                                                                                                                                                                                                                                                                                                                                                                                                                                                                                                                                                                                                                                                                                                                                                                                                                                                                                                                                                                                                                                                                                                                                                                                                                                                                                                                                                                                                                                                                                                                                                                                                                                                                                                                                                                                                                                                                                                                                                                                                                                                                                                                                                                                                                        |                                                                                                                                                                                                                                                                                                                                                                                                                                                                                                                                                                                                                                                                                                                                                                                                           |                                                                                                                                                                                                                                                                                                                                                                                                                                                                                                                                                                                                                                                                                                                                           |                                                                                                                                                                                                                                                                                                                                                                                                                                                                                                                                                                                                                                                                                                         |                                                                                                                                                                                                                                                                                                                                                                                                                                                                                                                                                                                                                                                                                                                                                                                                                                                                                  |                                                                                                                                                                                                                                                                                                                                                                                                                                                                                                                                                                                                                                                                                                         |
|                                                                                                                                                                                                                                                                                                                                                                                                                                                                                                                                                                                                                                                                                                                    | <ul style="list-style-type: none"><li>A temporal coherence regarding the occurrence, the cycle time and the phase between SEMs and a respiratory-like rhythm (autorhythmicity) [Rittweger, &amp; Pöpel, 1998 (159)]</li><li>A disappearance of saccades, a reduction of endogenous blinking, and an appearance slow eye movements (SEMs) during SO [Pizze <i>et al.</i>, 2011 (99)]</li><li>SEM activity shows a linear increase before the beginning of sleep NREM-I [Agnew &amp; Webb, 1972 (100); Hori <i>et al.</i>, 1982 (101); Ogilvie <i>et al.</i>, 1988 (102); De Gennaro <i>et al.</i>, 2000 (103)], declining progressively during the first minutes of NREM-II [Hiroshige <i>et al.</i>, 1999 (104); Pizze <i>et al.</i>, 2011 (99)]</li><li>Disappearance of SEM with the beginning of behaviourally defined SO [Ogilvie <i>et al.</i>, 1988 (102)]</li><li>Sleep spindles could trigger the reduction and the disappearance of SEMs in the late part of the SOP [De Gennaro <i>et al.</i>, 2000 (103)]</li><li>The split half of the distributions with respect to NREM-II onset indicated a positive correlation of delta power with the increase of SEM activity before SO, and of beta power with the decreased SEMs after SO [De Gennaro <i>et al.</i>, 2000 (103)]</li><li>Using Hori's scoring rules maximal SEM velocity was observed during sustained alpha suppression and delta-theta predominance at SOP [Porte, 2004 (105)]</li><li>During H7 and H8, characterised by VSW bursts and incipient spindles and KCs, SEM was maximal in amplitude during SOP [Porte, 2004 (105)]</li><li>Using nightcap, changes in spectral power of theta and alpha frequency bands correlated well with eyelid behaviour during SOP [Cantero <i>et al.</i>, 2002 (160)]</li><li>Changes in eyelid movement density predicted better than did changes in theta and alpha spectral power [Cantero <i>et al.</i>, 2002 (160)]</li><li>While hypnagogic dreams contained all the classic features of REM dreams, the relatively low frequencies of features such as self-representation and narrative plot (20% and 10%, respectively) highlight a dramatic difference between hypnagogic and REM dreams [Rowley <i>et al.</i>, 1998 (161)]</li><li>Although, there is no fixed order of appearance of dream features during SO, a preferred order is implied by their relative frequencies, with sensorimotor experience preceding the development of narrative plot [Rowley <i>et al.</i>, 1998 (161)]</li></ul>                                                                                                                                                                                                                                                                                                                                                                                                                                                                                                                                                                                                                                                                                                                                                                                                                                                                                                                                                                                                                                                                                                                                                                                                                                                                                                                                                                                                                                                                                                                                                                                                                                                                                                                                                                                                                                                                                                                                                                                                                                                                                                                                                                                                                                                                                                                                                                                                                                                                                                                               |                                                                                                                                                                                                                                                                                                                                                                                                                                                                                                                                                                                                                                                                                                                                                                                                           |                                                                                                                                                                                                                                                                                                                                                                                                                                                                                                                                                                                                                                                                                                                                           |                                                                                                                                                                                                                                                                                                                                                                                                                                                                                                                                                                                                                                                                                                         | <strong>Strengths:</strong> <ul style="list-style-type: none"><li>Great adjunct to other neuroimaging or electrophysiological measurements</li><li>Easy to implement</li><li>High temporal resolution for physiological measurements</li><li>Behavioural measures allow for information regarding overt cognitive processing to be obtained.</li></ul> <strong>Limitations:</strong> <ul style="list-style-type: none"><li>Great interindividual variability</li><li>Less accurate temporal correspondence between behavioural and electrophysiological measures underestimating SO</li><li>Needs systematic investigations as it is variable with time and in association with other factors</li></ul>                                                                                                                                                                          |                                                                                                                                                                                                                                                                                                                                                                                                                                                                                                                                                                                                                                                                                                         |
| Thermoregulation                                                                                                                                                                                                                                                                                                                                                                                                                                                                                                                                                                                                                                                                                                   |                                                                                                                                                                                                                                                                                                                                                                                                                                                                                                                                                                                                                                                                                                                                                                                                                                                                                                                                                                                                                                                                                                                                                                                                                                                                                                                                                                                                                                                                                                                                                                                                                                                                                                                                                                                                                                                                                                                                                                                                                                                                                                                                                                                                                                                                                                                                                                                                                                                                                                                                                                                                                                                                                                                                                                                                                                                                                                                                                                                                                                                                                                                                                                                                                                                                                                                                                                                                                                                                                                                                                                                                                                                                                                                                                                                                                                                                                                                                                                                                                                                                                                                                                                                                                                                                                                                                                                                                                                                                                                                                                                                                                                                                                                                                                                                                                                                                                                                                                                                                                                                        |                                                                                                                                                                                                                                                                                                                                                                                                                                                                                                                                                                                                                                                                                                                                                                                                           |                                                                                                                                                                                                                                                                                                                                                                                                                                                                                                                                                                                                                                                                                                                                           |                                                                                                                                                                                                                                                                                                                                                                                                                                                                                                                                                                                                                                                                                                         |                                                                                                                                                                                                                                                                                                                                                                                                                                                                                                                                                                                                                                                                                                                                                                                                                                                                                  |                                                                                                                                                                                                                                                                                                                                                                                                                                                                                                                                                                                                                                                                                                         |
|                                                                                                                                                                                                                                                                                                                                                                                                                                                                                                                                                                                                                                                                                                                    | <ul style="list-style-type: none"><li>A significant decline in core body temperature during SO [Zulley <i>et al.</i>, 1981 (87); Gillberg and Akerstedt, 1982 (162); Barrett <i>et al.</i>, 1993 (84); Murphy and Campbell, 1997 (86); Van Den Heuvel <i>et al.</i>, 1998 (88)]</li><li>In synchronized subjects, SO occurred, on the average, 1.34 h prior to the minimum of temperature. The desynchronized subjects had a broad bimodal distribution of SO (peaks 6.3 and 1.3 h before the minimum) [Zulley <i>et al.</i>, 1981 (87)]</li><li>Significant correlations between the interval from maximum rate of decline to SO and the amount of slow-wave sleep (SWS) during disenatrinment [Murphy and Campbell, 1997 (86)]</li><li>Significantly decreased rectal core temperature (T<sub>c</sub>) over time only in the Habitual Sleep condition [Van Den Heuvel <i>et al.</i>, 1998 (88)]</li><li>The greater decline in Habitual Sleep T<sub>c</sub> was associated with significantly increased pe-ripheral hand and foot skin temperatures before SO [Van Den Heuvel <i>et al.</i>, 1998 (88)]</li><li>Higher subjective sleepiness measures in the Habitual Sleep Onset condition from 150 min prior until SO [Van Den Heuvel <i>et al.</i>, 1998 (88)]</li><li>The distal-to-proximal skin temperature gradient was the best predictor variable for SOL [Kräuchi <i>et al.</i>, 2000 (89)]</li><li>Increased wrist skin temperatures (using wrist-worn accelerometer) on average by 0.6° (of Celcius) in 10 min prior to the SO and could be tracked robustly along a slope of time [Partonen <i>et al.</i>, 2022 (90)]</li></ul>                                                                                                                                                                                                                                                                                                                                                                                                                                                                                                                                                                                                                                                                                                                                                                                                                                                                                                                                                                                                                                                                                                                                                                                                                                                                                                                                                                                                                                                                                                                                                                                                                                                                                                                                                                                                                                                                                                                                                                                                                                                                                                                                                                                                                                                                                                                                                                                                                                                                                                                                                                                                                                                                                                                                                                                                                                                                                                                                                                                                                                                                                                                                                                                                                                                                                                                                                                                                         |                                                                                                                                                                                                                                                                                                                                                                                                                                                                                                                                                                                                                                                                                                                                                                                                           |                                                                                                                                                                                                                                                                                                                                                                                                                                                                                                                                                                                                                                                                                                                                           |                                                                                                                                                                                                                                                                                                                                                                                                                                                                                                                                                                                                                                                                                                         |                                                                                                                                                                                                                                                                                                                                                                                                                                                                                                                                                                                                                                                                                                                                                                                                                                                                                  | <strong>Strengths:</strong> <ul style="list-style-type: none"><li>Great adjunct to other neuroimaging or electrophysiological measurements</li><li>Easy to implement</li><li>High temporal resolution for physiological measurements</li><li>Behavioural measures allow for information regarding overt cognitive processing to be obtained.</li></ul> <strong>Limitations:</strong> <ul style="list-style-type: none"><li>Great interindividual variability</li><li>Less accurate temporal correspondence between behavioural and electrophysiological measures underestimating SO</li><li>Needs systematic investigations as it is variable with time and in association with other factors</li></ul> |
| Behavioural measurements                                                                                                                                                                                                                                                                                                                                                                                                                                                                                                                                                                                                                                                                                           |                                                                                                                                                                                                                                                                                                                                                                                                                                                                                                                                                                                                                                                                                                                                                                                                                                                                                                                                                                                                                                                                                                                                                                                                                                                                                                                                                                                                                                                                                                                                                                                                                                                                                                                                                                                                                                                                                                                                                                                                                                                                                                                                                                                                                                                                                                                                                                                                                                                                                                                                                                                                                                                                                                                                                                                                                                                                                                                                                                                                                                                                                                                                                                                                                                                                                                                                                                                                                                                                                                                                                                                                                                                                                                                                                                                                                                                                                                                                                                                                                                                                                                                                                                                                                                                                                                                                                                                                                                                                                                                                                                                                                                                                                                                                                                                                                                                                                                                                                                                                                                                        |                                                                                                                                                                                                                                                                                                                                                                                                                                                                                                                                                                                                                                                                                                                                                                                                           |                                                                                                                                                                                                                                                                                                                                                                                                                                                                                                                                                                                                                                                                                                                                           |                                                                                                                                                                                                                                                                                                                                                                                                                                                                                                                                                                                                                                                                                                         |                                                                                                                                                                                                                                                                                                                                                                                                                                                                                                                                                                                                                                                                                                                                                                                                                                                                                  |                                                                                                                                                                                                                                                                                                                                                                                                                                                                                                                                                                                                                                                                                                         |
|                                                                                                                                                                                                                                                                                                                                                                                                                                                                                                                                                                                                                                                                                                                    | <ul style="list-style-type: none"><li>Decreased responsivity to external sensory stimuli coupled with sharp increases in EEG synchronisation as EEG stages passed from W through NREM I to II at SO demonstrated in (I) auditory reaction times [Birrell, 1983 (110); Ogilvie and Wilkinson, 1984 (111); Ogilvie <i>et al.</i>, 1989 (108); 1991 (52); Scott <i>et al.</i>, 2018 (163)]; (II) reaction times to vibratory stimuli [Scott <i>et al.</i>, 2021 (164)] with responses to stimuli typically ceasing between late-NREM-I sleep and NREM-II during SO; (III) duration of time intervals between consecutive self-generated motor responses in a finger tapping task with a greater proportion of slow-wave sleep (SWS) observed during transition from wakefulness to sleep in motor-generated tasks compared with the RTT [Casagrande <i>et al.</i>, 1995 (165), 1997 (112)]; (IV) combined simultaneously-recorded physiological measurements of behavioural, with EEG and respiratory data [Ogilvie and Wilkinson, 1984 (111); Ogilvie <i>et al.</i>, 1989 (108)]; ERP [Ogilvie <i>et al.</i>, 1991 (52)] characterising the SOP with markers of the reduction of alpha power, the increase of theta and delta power and the reduction of muscle activity in a sustained breathing paradigm [Prerau <i>et al.</i>, 2014 (166)]; (V) clock monitored microswitch release [Viens <i>et al.</i>, 1988 (109)]</li><li>Shorter SOL for the left hemisphere, considering both behavioural (cessation of the FTT for more than 2.5 s) and EEG SOL [Casagrande &amp; Bertini, 2008 (167)]</li><li>Strong association of alpha level [as sleep Stage Wake (w) vs. NREM-I sleep] with behavioural level, and a strong association of alpha loss events with key closure events in alpha abundant (high-alpha) subjects [Perry &amp; Goldwater, 1987 (94)]</li><li>Reduced alertness indexed by EEG or behavioural markers at SO in healthy controls is linked with a remarkable asymmetric increase in error rates to mislocate left-sided auditory stimuli to the right [Bareham <i>et al.</i>, 2014 (107)]</li></ul>                                                                                                                                                                                                                                                                                                                                                                                                                                                                                                                                                                                                                                                                                                                                                                                                                                                                                                                                                                                                                                                                                                                                                                                                                                                                                                                                                                                                                                                                                                                                                                                                                                                                                                                                                                                                                                                                                                                                                                                                                                                                                                                                                                                                                                                                                                                                                                                                                                                                                                                                                                                                                                                                                                                                                                                                                                                                                                                              | <strong>Strengths:</strong> <ul style="list-style-type: none"><li>Great adjunct to other neuroimaging or electrophysiological measurements</li><li>Easy to implement</li><li>High temporal resolution for physiological measurements</li><li>Behavioural measures allow for information regarding overt cognitive processing to be obtained.</li></ul> <strong>Limitations:</strong> <ul style="list-style-type: none"><li>Great interindividual variability</li><li>Less accurate temporal correspondence between behavioural and electrophysiological measures underestimating SO</li><li>Needs systematic investigations as it is variable with time and in association with other factors</li></ul>                                                                                                   |                                                                                                                                                                                                                                                                                                                                                                                                                                                                                                                                                                                                                                                                                                                                           |                                                                                                                                                                                                                                                                                                                                                                                                                                                                                                                                                                                                                                                                                                         |                                                                                                                                                                                                                                                                                                                                                                                                                                                                                                                                                                                                                                                                                                                                                                                                                                                                                  |                                                                                                                                                                                                                                                                                                                                                                                                                                                                                                                                                                                                                                                                                                         |
| BP, blood pressure; BV, blood volume; CBF, cerebral blood flow; DMN, default mode network; deoxy-Hb, deoxygenated haemoglobin; DPFC, dorsolateral prefrontal cortex; FC, functional connectivity; IPL, IPL, inferior parietal lobule; HF, high frequency; HR, heart rate; HRV, heart rate variability; HPC, hippocampus; KC, K-complex; LF, low frequency; LPFC, lateral prefrontal cortex; MCC, medial cingulate cortex; MMN, mismatch negativity; MPFC, medial prefrontal cortex; oxy-Hb, oxygenated haemoglobin; PCC, posterior cingulate cortex; PFC, prefrontal cortex; RT, reaction time; SD, sleep deprivation; SO, sleep-onset; SOP, sleep-onset period; SOL, sleep-onset latency; VSW, vertex sharp wave. |                                                                                                                                                                                                                                                                                                                                                                                                                                                                                                                                                                                                                                                                                                                                                                                                                                                                                                                                                                                                                                                                                                                                                                                                                                                                                                                                                                                                                                                                                                                                                                                                                                                                                                                                                                                                                                                                                                                                                                                                                                                                                                                                                                                                                                                                                                                                                                                                                                                                                                                                                                                                                                                                                                                                                                                                                                                                                                                                                                                                                                                                                                                                                                                                                                                                                                                                                                                                                                                                                                                                                                                                                                                                                                                                                                                                                                                                                                                                                                                                                                                                                                                                                                                                                                                                                                                                                                                                                                                                                                                                                                                                                                                                                                                                                                                                                                                                                                                                                                                                                                                        |                                                                                                                                                                                                                                                                                                                                                                                                                                                                                                                                                                                                                                                                                                                                                                                                           |                                                                                                                                                                                                                                                                                                                                                                                                                                                                                                                                                                                                                                                                                                                                           |                                                                                                                                                                                                                                                                                                                                                                                                                                                                                                                                                                                                                                                                                                         |                                                                                                                                                                                                                                                                                                                                                                                                                                                                                                                                                                                                                                                                                                                                                                                                                                                                                  |                                                                                                                                                                                                                                                                                                                                                                                                                                                                                                                                                                                                                                                                                                         |

**Table S2** The sleep onset process in patients with sleep disorders

| Method of study                           | Type of disorder                                                                                                                                                                                                                                                                                                                                                                                                                                                                                                                                                                                                                                                                                                                                                                                                                                                                                                                                                                                                                                                                                                                                                                         | Main findings                                                                                                                                                                                                                                                                                                                                                                                                                                                                                                                                                                                                                                                                                                                                                                                                                                                                                                                                                                                                                                                                            |                                                                                                                                                                                                                                                                                                                                                                                                                                                                                                                                                                                                                                                                                                                                                                                                                                                                                                                                                                                                                                                                                                                |
|-------------------------------------------|------------------------------------------------------------------------------------------------------------------------------------------------------------------------------------------------------------------------------------------------------------------------------------------------------------------------------------------------------------------------------------------------------------------------------------------------------------------------------------------------------------------------------------------------------------------------------------------------------------------------------------------------------------------------------------------------------------------------------------------------------------------------------------------------------------------------------------------------------------------------------------------------------------------------------------------------------------------------------------------------------------------------------------------------------------------------------------------------------------------------------------------------------------------------------------------|------------------------------------------------------------------------------------------------------------------------------------------------------------------------------------------------------------------------------------------------------------------------------------------------------------------------------------------------------------------------------------------------------------------------------------------------------------------------------------------------------------------------------------------------------------------------------------------------------------------------------------------------------------------------------------------------------------------------------------------------------------------------------------------------------------------------------------------------------------------------------------------------------------------------------------------------------------------------------------------------------------------------------------------------------------------------------------------|----------------------------------------------------------------------------------------------------------------------------------------------------------------------------------------------------------------------------------------------------------------------------------------------------------------------------------------------------------------------------------------------------------------------------------------------------------------------------------------------------------------------------------------------------------------------------------------------------------------------------------------------------------------------------------------------------------------------------------------------------------------------------------------------------------------------------------------------------------------------------------------------------------------------------------------------------------------------------------------------------------------------------------------------------------------------------------------------------------------|
| Electroencephalogram (EEG)                |                                                                                                                                                                                                                                                                                                                                                                                                                                                                                                                                                                                                                                                                                                                                                                                                                                                                                                                                                                                                                                                                                                                                                                                          |                                                                                                                                                                                                                                                                                                                                                                                                                                                                                                                                                                                                                                                                                                                                                                                                                                                                                                                                                                                                                                                                                          |                                                                                                                                                                                                                                                                                                                                                                                                                                                                                                                                                                                                                                                                                                                                                                                                                                                                                                                                                                                                                                                                                                                |
| Standard sleep staging                    | Narcolepsy without cataplexy (N-C)                                                                                                                                                                                                                                                                                                                                                                                                                                                                                                                                                                                                                                                                                                                                                                                                                                                                                                                                                                                                                                                                                                                                                       | <ul style="list-style-type: none"><li>SOREM periods in the IHL, BISS and PLMD groups arose from NREM-II sleep, 75% of those in N+C arose from NREM-I and in N–C only 52% arose from NREM-I [Drakatos <i>et al.</i>, 2013 (168)]</li><li>Within the N-C group, those with SOREM periods arising from NREM-I had a shorter MSL [Drakatos <i>et al.</i>, 2013 (168)]</li><li>Significantly longer SusSL (three sleep NREM-I epochs or any other sleep stage epoch, than SL( the time elapsed to the occurrence of a single epoch of sleep NREM-I) in IH patients compared with N-C and N+C patients [Pizza <i>et al.</i>, 2011 (73)]</li><li>IH fluctuated through a wake-NREM-I before the onset of sustained sleep, while N+C and N-C shift abruptly into a sustained sleep [Pizza <i>et al.</i>, 2011 (73)]</li><li>Patients with insomnia, were best able to estimate their SL by the first epoch scored as NREM-II that is followed by at least 15 min of uninterrupted sleep [Rauri &amp; Olmstead, 1983 (169)]</li></ul>                                                             |                                                                                                                                                                                                                                                                                                                                                                                                                                                                                                                                                                                                                                                                                                                                                                                                                                                                                                                                                                                                                                                                                                                |
| Sub-division of standard sleep stages     | Narcolepsy with cataplexy (N+C)                                                                                                                                                                                                                                                                                                                                                                                                                                                                                                                                                                                                                                                                                                                                                                                                                                                                                                                                                                                                                                                                                                                                                          |                                                                                                                                                                                                                                                                                                                                                                                                                                                                                                                                                                                                                                                                                                                                                                                                                                                                                                                                                                                                                                                                                          |                                                                                                                                                                                                                                                                                                                                                                                                                                                                                                                                                                                                                                                                                                                                                                                                                                                                                                                                                                                                                                                                                                                |
|                                           | Idiopathic Hypersomnia (IH)                                                                                                                                                                                                                                                                                                                                                                                                                                                                                                                                                                                                                                                                                                                                                                                                                                                                                                                                                                                                                                                                                                                                                              |                                                                                                                                                                                                                                                                                                                                                                                                                                                                                                                                                                                                                                                                                                                                                                                                                                                                                                                                                                                                                                                                                          |                                                                                                                                                                                                                                                                                                                                                                                                                                                                                                                                                                                                                                                                                                                                                                                                                                                                                                                                                                                                                                                                                                                |
|                                           | Behaviourally induced inadequate sleep syndrome (BISS)                                                                                                                                                                                                                                                                                                                                                                                                                                                                                                                                                                                                                                                                                                                                                                                                                                                                                                                                                                                                                                                                                                                                   |                                                                                                                                                                                                                                                                                                                                                                                                                                                                                                                                                                                                                                                                                                                                                                                                                                                                                                                                                                                                                                                                                          |                                                                                                                                                                                                                                                                                                                                                                                                                                                                                                                                                                                                                                                                                                                                                                                                                                                                                                                                                                                                                                                                                                                |
|                                           | Periodic limb movement disorder (PLMD)                                                                                                                                                                                                                                                                                                                                                                                                                                                                                                                                                                                                                                                                                                                                                                                                                                                                                                                                                                                                                                                                                                                                                   |                                                                                                                                                                                                                                                                                                                                                                                                                                                                                                                                                                                                                                                                                                                                                                                                                                                                                                                                                                                                                                                                                          |                                                                                                                                                                                                                                                                                                                                                                                                                                                                                                                                                                                                                                                                                                                                                                                                                                                                                                                                                                                                                                                                                                                |
|                                           | Sleep onset insomnia (SOI)                                                                                                                                                                                                                                                                                                                                                                                                                                                                                                                                                                                                                                                                                                                                                                                                                                                                                                                                                                                                                                                                                                                                                               | <ul style="list-style-type: none"><li>Patients with SOI had more 4-second epochs scored as awake, and took longer to achieve 30 continuous 4-second epochs of NREM sleep after the first epoch of NREM-I [Moul <i>et al.</i>, 2007 (63)]</li><li>A slower rate of accumulating sleep was detected only with the 4-s scoring during SOP [Moul <i>et al.</i>, 2007 (63)]</li><li>Momentary state-switching instabilities in SIO [Moul <i>et al.</i>, 2007 (63)]</li></ul>                                                                                                                                                                                                                                                                                                                                                                                                                                                                                                                                                                                                                  |                                                                                                                                                                                                                                                                                                                                                                                                                                                                                                                                                                                                                                                                                                                                                                                                                                                                                                                                                                                                                                                                                                                |
| Quantitative EEG                          |                                                                                                                                                                                                                                                                                                                                                                                                                                                                                                                                                                                                                                                                                                                                                                                                                                                                                                                                                                                                                                                                                                                                                                                          |                                                                                                                                                                                                                                                                                                                                                                                                                                                                                                                                                                                                                                                                                                                                                                                                                                                                                                                                                                                                                                                                                          |                                                                                                                                                                                                                                                                                                                                                                                                                                                                                                                                                                                                                                                                                                                                                                                                                                                                                                                                                                                                                                                                                                                |
| Spectral power                            | Narcolepsy without cataplexy (N-C)                                                                                                                                                                                                                                                                                                                                                                                                                                                                                                                                                                                                                                                                                                                                                                                                                                                                                                                                                                                                                                                                                                                                                       | <ul style="list-style-type: none"><li>Significantly higher mean delta and theta amplitude across the SOP for narcoleptic REM naps and narcoleptic NREM-II naps compared with the SOP of normal NREM-II naps or normal NREM-I naps [Alloway <i>et al.</i>, 1999 (170)]</li><li>Significantly lower mean alpha amplitude for narcoleptic REM naps and narcoleptic NREM-II naps compared with normal naps containing just NREM-I [Alloway, <i>et al.</i>, 1999 (170)]</li><li>Significantly lower mean sigma amplitude for narcoleptic REM naps compared to normal NREM-I naps, and tended to be lower for narcoleptic REM naps compared to normal NREM-II naps [Alloway, <i>et al.</i>, 1999 (170)]</li><li>Mean beta amplitude did not differ between the narcoleptic and normal SOP [Alloway, <i>et al.</i>, 1999 (170)]</li></ul>                                                                                                                                                                                                                                                       |                                                                                                                                                                                                                                                                                                                                                                                                                                                                                                                                                                                                                                                                                                                                                                                                                                                                                                                                                                                                                                                                                                                |
|                                           | Narcolepsy with Cataplexy (N+C)                                                                                                                                                                                                                                                                                                                                                                                                                                                                                                                                                                                                                                                                                                                                                                                                                                                                                                                                                                                                                                                                                                                                                          |                                                                                                                                                                                                                                                                                                                                                                                                                                                                                                                                                                                                                                                                                                                                                                                                                                                                                                                                                                                                                                                                                          |                                                                                                                                                                                                                                                                                                                                                                                                                                                                                                                                                                                                                                                                                                                                                                                                                                                                                                                                                                                                                                                                                                                |
|                                           | Sleep-onset insomnia (SOI)                                                                                                                                                                                                                                                                                                                                                                                                                                                                                                                                                                                                                                                                                                                                                                                                                                                                                                                                                                                                                                                                                                                                                               |                                                                                                                                                                                                                                                                                                                                                                                                                                                                                                                                                                                                                                                                                                                                                                                                                                                                                                                                                                                                                                                                                          | <ul style="list-style-type: none"><li>Reduced alpha power for patients with insomnia [Lamarche and Ogilvie, 1997 (171); Freedman, 1986 (64)], combined with a failure to reduce alpha power and beta-1 power during the SOP [Staner <i>et al.</i>, 2003 (68)]</li><li>All frequencies below the beta range, have slower rise rates and reach lower levels in the insomnia group during SOP [Freedman, 1986 (64); Merica <i>et al.</i>, 1998 (65); Merica &amp; Gaillard, 1992 (66); Perlis <i>et al.</i>, 2001 (67); Staner <i>et al.</i>, 2003 (68)] with increased beta power maximally during NREM-I [Perlis <i>et al.</i>, 2001 (67)]</li></ul>                                                                                                                                                                                                                                                                                                                                                                                                                                                            |
|                                           | Sleep maintenance insomnia (SMI)                                                                                                                                                                                                                                                                                                                                                                                                                                                                                                                                                                                                                                                                                                                                                                                                                                                                                                                                                                                                                                                                                                                                                         |                                                                                                                                                                                                                                                                                                                                                                                                                                                                                                                                                                                                                                                                                                                                                                                                                                                                                                                                                                                                                                                                                          | <ul style="list-style-type: none"><li>Increased delta band (0.5–4 Hz) power and decreased beta band (15–30 Hz) power during the SOP [Alloway <i>et al.</i>, 1999 (170); Freedman, 1986 (64); Lamarche and Ogilvie, 1997 (171); Merica and Gaillard, 1992 (66)]</li><li>Significantly lower beta-2 frequency band (18–29.75 Hz) power in SOI than in SMI preceding SO [Cervena <i>et al.</i>, 2014 (69)]</li><li>Significantly higher alpha power for SMI group compared with good sleepers (GS) before SO [Cervena <i>et al.</i>, 2014 (69)]</li><li>In SOI group, delta power increased slower after sleep onset; beta2 and 3 (18–29.75 and 30–39.75 Hz) power decrease less abruptly before SO; beta1 (15–17.75 Hz) power increased through the whole SOP [Cervena <i>et al.</i>, 2014 (69)]</li><li>Less alpha during the first part of SOP, the absence of the dramatic drop in alpha across the SOP, less delta in the last quartile of the chronological analysis of the SOP were observed in individuals with psychophysiological insomnia [Lamarche &amp; Ogilvie <i>et al.</i>, 1997 (171)]</li></ul> |
|                                           | Restless Legs syndrome (RLS)                                                                                                                                                                                                                                                                                                                                                                                                                                                                                                                                                                                                                                                                                                                                                                                                                                                                                                                                                                                                                                                                                                                                                             |                                                                                                                                                                                                                                                                                                                                                                                                                                                                                                                                                                                                                                                                                                                                                                                                                                                                                                                                                                                                                                                                                          | <ul style="list-style-type: none"><li>Lower relative beta power in psychiatric insomnia cohort and higher relative beta power values in psychophysiological cohort during wakefulness [Lamarche &amp; Ogilvie <i>et al.</i>, 1997 (171)]</li><li>Significantly higher frontal beta power and current density, and beta and gamma frontoparietal temporal coupling during waking and NREM-I in patients with SOI [Corsi-Cabrera <i>et al.</i>, 2012 (70)]</li><li>Increased alpha and beta bands and/or beta/delta ratio in RLS versus normal controls, during both early-SOP and late-SOP which were, however, smaller than the increases found in patients with insomnia [Ferri <i>et al.</i>, 2014 (71)]</li></ul>                                                                                                                                                                                                                                                                                                                                                                                           |
| Dynamic detrended fluctuation analysis    | Narcolepsy without cataplexy (N-C)<br>Narcolepsy with Cataplexy (N+C)                                                                                                                                                                                                                                                                                                                                                                                                                                                                                                                                                                                                                                                                                                                                                                                                                                                                                                                                                                                                                                                                                                                    | <ul style="list-style-type: none"><li>Electrophysiological brain activity was changing rapidly across the SOP with a significantly larger SOP in individuals with narcolepsy [Kim <i>et al.</i>, 2009 (72)]</li></ul>                                                                                                                                                                                                                                                                                                                                                                                                                                                                                                                                                                                                                                                                                                                                                                                                                                                                    |                                                                                                                                                                                                                                                                                                                                                                                                                                                                                                                                                                                                                                                                                                                                                                                                                                                                                                                                                                                                                                                                                                                |
| Event-related potentials                  |                                                                                                                                                                                                                                                                                                                                                                                                                                                                                                                                                                                                                                                                                                                                                                                                                                                                                                                                                                                                                                                                                                                                                                                          |                                                                                                                                                                                                                                                                                                                                                                                                                                                                                                                                                                                                                                                                                                                                                                                                                                                                                                                                                                                                                                                                                          |                                                                                                                                                                                                                                                                                                                                                                                                                                                                                                                                                                                                                                                                                                                                                                                                                                                                                                                                                                                                                                                                                                                |
| Auditory-related evoked potentials        | Sleep-onset insomnia (SOI)<br>sleep maintenance insomnia (SMI)                                                                                                                                                                                                                                                                                                                                                                                                                                                                                                                                                                                                                                                                                                                                                                                                                                                                                                                                                                                                                                                                                                                           | <ul style="list-style-type: none"><li>P2 amplitude was significantly smaller for poor sleepers compared with GS, following standard stimuli at all fronto-central sites, at SO. Groups did not differ in N1, N350, or P300 amplitudes in wake, NREM-I, or NREM-II [Kertesz, &amp; Cote, 2011 (172)]</li></ul>                                                                                                                                                                                                                                                                                                                                                                                                                                                                                                                                                                                                                                                                                                                                                                            |                                                                                                                                                                                                                                                                                                                                                                                                                                                                                                                                                                                                                                                                                                                                                                                                                                                                                                                                                                                                                                                                                                                |
| Cerebral blood flow                       |                                                                                                                                                                                                                                                                                                                                                                                                                                                                                                                                                                                                                                                                                                                                                                                                                                                                                                                                                                                                                                                                                                                                                                                          |                                                                                                                                                                                                                                                                                                                                                                                                                                                                                                                                                                                                                                                                                                                                                                                                                                                                                                                                                                                                                                                                                          |                                                                                                                                                                                                                                                                                                                                                                                                                                                                                                                                                                                                                                                                                                                                                                                                                                                                                                                                                                                                                                                                                                                |
| Xenon133 inhalation                       | Narcolepsy<br>Obstructive Sleep Apnea                                                                                                                                                                                                                                                                                                                                                                                                                                                                                                                                                                                                                                                                                                                                                                                                                                                                                                                                                                                                                                                                                                                                                    | <ul style="list-style-type: none"><li>Increased CBF values in narcolepsy patients but decreased CBF values in patients with sleep apnea [Meyer <i>et al.</i>, 1987 (173)]</li></ul>                                                                                                                                                                                                                                                                                                                                                                                                                                                                                                                                                                                                                                                                                                                                                                                                                                                                                                      |                                                                                                                                                                                                                                                                                                                                                                                                                                                                                                                                                                                                                                                                                                                                                                                                                                                                                                                                                                                                                                                                                                                |
| Physiologic measurements                  |                                                                                                                                                                                                                                                                                                                                                                                                                                                                                                                                                                                                                                                                                                                                                                                                                                                                                                                                                                                                                                                                                                                                                                                          |                                                                                                                                                                                                                                                                                                                                                                                                                                                                                                                                                                                                                                                                                                                                                                                                                                                                                                                                                                                                                                                                                          |                                                                                                                                                                                                                                                                                                                                                                                                                                                                                                                                                                                                                                                                                                                                                                                                                                                                                                                                                                                                                                                                                                                |
| Cardiovascular and respiratory activities | Sleep-onset insomnia (SOI)<br>sleep maintenance insomnia (SMI)                                                                                                                                                                                                                                                                                                                                                                                                                                                                                                                                                                                                                                                                                                                                                                                                                                                                                                                                                                                                                                                                                                                           | <ul style="list-style-type: none"><li>A higher initial HR (an index primarily modulated by parasympathetic activity at rest) in baseline in SOI group, but no differences observed compared with healthy controls in pre- and post-SO [Freedman &amp; Sattler, 1982 (174); De Zambotti <i>et al.</i>, 2011 (175)]</li><li>A significantly higher low-frequency percentage of HRV in pre-NREM- I with a reduction in HR 160s beginning prior to NREM- I onset amongst GS with HR of those with insomnia only to decline after NREM-I onset [Tsai <i>et al.</i>, 2019 (176)]</li><li>Both the insomnia cohort and healthy control had their HRs dropped to a level comparable to their HRs at 220 s and 80 s prior to NREM-II onset respectively [Tsai <i>et al.</i>, 2019 (176)]</li><li>Increased pre-ejection period (PEP) (related inversely to sympathetic β-adrenergic activity) after SO in controls, but remained unchanged in those with insomnia. PEP was also significantly lower in insomniacs than in GS in both conditions [De Zambotti <i>et al.</i>, 2011 (175)]</li></ul> |                                                                                                                                                                                                                                                                                                                                                                                                                                                                                                                                                                                                                                                                                                                                                                                                                                                                                                                                                                                                                                                                                                                |
|                                           | Obstructive Sleep Apnea (OSA)                                                                                                                                                                                                                                                                                                                                                                                                                                                                                                                                                                                                                                                                                                                                                                                                                                                                                                                                                                                                                                                                                                                                                            |                                                                                                                                                                                                                                                                                                                                                                                                                                                                                                                                                                                                                                                                                                                                                                                                                                                                                                                                                                                                                                                                                          |                                                                                                                                                                                                                                                                                                                                                                                                                                                                                                                                                                                                                                                                                                                                                                                                                                                                                                                                                                                                                                                                                                                |
| Various Sleep Disorders (VSD)             | <ul style="list-style-type: none"><li>Diaphragm tone and end-expiratory lung volume frequently decreased following SO, with greater falls at transitions accompanied by respiratory events [Stadler <i>et al.</i>, 2010 (177)]</li><li>Small but consistent decrements in the activity of both the TP and GG muscles in healthy controls but large, significantly greater decrements in TP EMG in OSA patients at SO [Mezzanotte <i>et al.</i>, 1996 (178)]</li><li>Significant decrement in UA dilator muscle activity following SO [Fogel <i>et al.</i>, 2005 (179); Mezzanotte <i>et al.</i>, 1996 (178); Stadler <i>et al.</i>, 2010 (177)]</li><li>Greater fall in GG EMG in the OSA patients followed by subsequent muscle recruitment following alpha to theta transition (in whom upper airways dilator increases) [Fogel <i>et al.</i>, 2005 (179)]</li><li>Significant decrease in low-frequency power 2 mins prior to SO and no significant change in high-frequency power in all groups (controls, OSA, VSD) [Shinar <i>et al.</i>, 2006 (96)]</li><li>Higher sympathovagal balance in OSAS and VSD patients before and after SO [Shinar <i>et al.</i>, 2006 (96)]</li></ul> |                                                                                                                                                                                                                                                                                                                                                                                                                                                                                                                                                                                                                                                                                                                                                                                                                                                                                                                                                                                                                                                                                          |                                                                                                                                                                                                                                                                                                                                                                                                                                                                                                                                                                                                                                                                                                                                                                                                                                                                                                                                                                                                                                                                                                                |
| Ocular activities                         | Obstructive Sleep Apnea (SOA)                                                                                                                                                                                                                                                                                                                                                                                                                                                                                                                                                                                                                                                                                                                                                                                                                                                                                                                                                                                                                                                                                                                                                            |                                                                                                                                                                                                                                                                                                                                                                                                                                                                                                                                                                                                                                                                                                                                                                                                                                                                                                                                                                                                                                                                                          | <ul style="list-style-type: none"><li>Mean slow eye movement (SEM) latency significantly correlated with SL at the MSLT [Fabbri <i>et al.</i>, 2010 (180)]</li><li>Both SEMs latency and SLs were significantly shorter in OSA than normal MSLT patients [Fabbri <i>et al.</i>, 2009 (181)]</li></ul>                                                                                                                                                                                                                                                                                                                                                                                                                                                                                                                                                                                                                                                                                                                                                                                                          |
| Thermoregulation                          | Sleep-onset insomnia (SOI)<br>sleep maintenance insomnia (SMI)                                                                                                                                                                                                                                                                                                                                                                                                                                                                                                                                                                                                                                                                                                                                                                                                                                                                                                                                                                                                                                                                                                                           |                                                                                                                                                                                                                                                                                                                                                                                                                                                                                                                                                                                                                                                                                                                                                                                                                                                                                                                                                                                                                                                                                          | <ul style="list-style-type: none"><li>The temperature rhythm markers of the insomnia group’s rhythms were approximately 2.5 h later than those of the GS. Their usual bedtime fell within the “wake maintenance zone” of their delayed temperature rhythm [Morris <i>et al.</i>, 1990 (182)]</li><li>Positive correlation between the amount of wakefulness within the first hour after initial SO and maximum rate of decline relative to SO in individuals with SMI [Campbell and Broughton 1994 (85)]</li></ul>                                                                                                                                                                                                                                                                                                                                                                                                                                                                                                                                                                                             |
| Behavioural measurements                  | Sleep-onset insomnia (SOI)<br>Sleep maintenance insomnia (SMI)                                                                                                                                                                                                                                                                                                                                                                                                                                                                                                                                                                                                                                                                                                                                                                                                                                                                                                                                                                                                                                                                                                                           | <ul style="list-style-type: none"><li>Significant differences between the three different measures of SOL. Estimates of SOL provided by the subjects were significantly longer than those recorded by the switch activated clock which were significantly longer than their partners estimates [Franklin, 1981 (183)]</li></ul>                                                                                                                                                                                                                                                                                                                                                                                                                                                                                                                                                                                                                                                                                                                                                          |                                                                                                                                                                                                                                                                                                                                                                                                                                                                                                                                                                                                                                                                                                                                                                                                                                                                                                                                                                                                                                                                                                                |

GG, genioglossus; GS, good sleepers; HR, heart rate; HRV, heart rate variability; SO, MSLT, multiple sleep latency test; SL, sleep latency; sleep-onset; SOP, sleep-onset period; SOL, sleep-onset latency; SusSL, sustained sleep latency; TP, tensor platini.

Table S3 Methodological evaluation of studies using the EPHPP Quality Assessment Tool for Quantitative Studies

| Author and year                                 | Population studied                                                             | Selection bias   | Study design | Confounders | Blinding | Data collection method | Withdrawals and dropouts | Global rating |
|-------------------------------------------------|--------------------------------------------------------------------------------|------------------|--------------|-------------|----------|------------------------|--------------------------|---------------|
| Agnew and Webb, 1972 (100)                      | Healthy Controls                                                               | Strong           | Weak         | Strong      | Moderate | Strong                 | NA                       | Moderate      |
| Sakai <i>et al.</i> , 1980 (146)                | Healthy Controls                                                               | Strong           | Weak         | Strong      | Moderate | Strong                 | NA                       | Moderate      |
| Franklin, 1981 (183)                            | Insomniacs                                                                     | Strong           | Weak         | Weak        | Moderate | Weak                   | NA                       | Moderate      |
| Naifeh and Kamiya <i>et al.</i> , 1981 (93)     | Healthy Controls                                                               | Strong           | Weak         | Strong      | Moderate | Moderate               | NA                       | Moderate      |
| Zulley <i>et al.</i> , 1981 (87)                | Healthy Controls                                                               | Strong           | Weak         | Strong      | Moderate | Moderate               | NA                       | Moderate      |
| Freedman and Sattler, 1982 (174)                | Primary Insomnia                                                               | Strong           | Weak         | Strong      | Moderate | Strong                 | Strong                   | Moderate      |
| Gillberg and Akerstedt, 1982 (162)              | Healthy Controls                                                               | Strong           | Moderate     | Strong      | Moderate | Strong                 | NA                       | Strong        |
| Hori <i>et al.</i> , 1982 (101)                 | Healthy Controls                                                               | Strong           | Weak         | Strong      | Moderate | Strong                 | NA                       | Moderate      |
| Birrell., 1983 (110)                            | Healthy Controls                                                               | Strong           | Weak         | Moderate    | Moderate | Moderate               | NA                       | Moderate      |
| Rauri and Olmstead , 1983 (169)                 | Insomnia<br>Healthy Controls                                                   | Strong           | Moderate     | Strong      | Moderate | Strong                 |                          | Strong        |
| Ogilvie and Wilkinson, 1984 (111)               | Healthy Controls                                                               | Strong           | Weak         | Strong      | Moderate | Strong                 | NA                       | Strong        |
| Hori <i>et al.</i> , 1985 (46)                  | Healthy Controls                                                               | Strong           | Weak         | Strong      | Moderate | Strong                 | N/A                      | Moderate      |
| Freedman, 1986 (64)                             | Primary Insomnia<br>Healthy Controls                                           | Strong           | Moderate     | Strong      | Moderate | Strong                 | NA                       | Strong        |
| Colrain <i>et al.</i> , 1987 (147)              | Healthy Controls                                                               | Moderate         | Weak         | Strong      | Moderate | Strong                 | NA                       | Moderate      |
| Meyer <i>et al.</i> , 1987 (173)                | Narcolepsy<br>Obstructive Sleep Apnea<br>Healthy Controls                      | Strong           | Moderate     | Moderate    | Moderate | Moderate               |                          | Strong        |
| Perry and Goldwater., 1987 (94)                 | Healthy Controls                                                               | Weak             | Weak         | Moderate    | Moderate | Strong                 | Strong                   | Moderate      |
| Ogilvie <i>et al.</i> , 1988 (102)              | Healthy Controls                                                               | Strong           | Weak         | Strong      | Moderate | Strong                 | NA                       | Moderate      |
| Viens <i>et al.</i> , 1988 (109)                | Healthy Controls                                                               | Weak             | Weak         | Moderate    | Moderate | Moderate               | NA                       | Weak          |
| Ogilvie <i>et al.</i> , 1989 (108)              | Healthy Controls                                                               | Strong           | Weak         | Strong      | Moderate | Strong                 | Strong                   | Moderate      |
| Morris <i>et al.</i> , 1990 (182)               | Primary Insomnia<br>Healthy Controls                                           | Strong           | Moderate     | Strong      | Moderate | Strong                 | NA                       | Strong        |
| Nielsen-Bohlman <i>et al.</i> , 1991 (127)      | Healthy Controls                                                               | Strong           | Weak         | Strong      | Moderate | Strong                 | Strong                   | Moderate      |
| Ogilvie <i>et al.</i> , 1991 (52)               | Healthy Controls                                                               | Moderate         | Weak         | Strong      | Moderate | Strong                 | NA                       | Moderate      |
| Merica and Gaillard <i>et al.</i> , 1992 (66)   | Insomniacs<br>Healthy Controls                                                 | Strong           | Moderate     | Strong      | Moderate | Strong                 | NA                       | Strong        |
| Trinder <i>et al.</i> , 1992 (148)              | Healthy Controls                                                               | Strong           | Weak         | Strong      | Moderate | Strong                 | NA                       | Moderate      |
| Barrett <i>et al.</i> , 1993 (84)               | Healthy Controls                                                               | Strong           | Weak         | Strong      | Moderate | Strong                 | NA                       | Moderate      |
| Campbell and Broughton, 1994 (85)               | Secondary Insomnia                                                             | Strong           | Weak         | Strong      | Moderate | Strong                 | NA                       | Moderate      |
| Hajak <i>et al.</i> , 1994 (145)                | Healthy Controls                                                               | Strong           | Weak         | Moderate    | Moderate | Strong                 | Moderate                 | Moderate      |
| Harsh <i>et al.</i> , 1994 (125)                | Healthy Controls                                                               | Strong           | Weak         | Strong      | Moderate | Strong                 | NA                       | Moderate      |
| Hasan &Broughton, 1994 (59)                     | Healthy Controls                                                               | Moderate         | Weak         | Moderate    | Moderate | Strong                 | NA                       | Moderate      |
| Hori <i>et al.</i> , 1994 (40)                  | Healthy Controls                                                               | Healthy Controls | Weak         | Strong      | Moderate | Moderate               | NA                       | Moderate      |
| Hoshi <i>et al.</i> , 1994 (79)                 | Healthy Controls                                                               | Strong           | Weak         | Strong      | Moderate | Moderate               | NA                       | Moderate      |
| Kay <i>et al.</i> , 1994 (91)                   | Healthy Controls                                                               | Weak             | Moderate     | Strong      | Moderate | Strong                 | NA                       | Moderate      |
| Bastuji <i>et al.</i> , 1995 (132)              | Healthy Controls                                                               | Strong           | Weak         | Strong      | Moderate | Strong                 | NA                       | Moderate      |
| Casagrande <i>et al.</i> , 1995 (165)           | Healthy Controls                                                               | Strong           | Weak         | Strong      | Moderate | Strong                 | NA                       | Moderate      |
| Klingelhöfer <i>et al.</i> , 1995 (142)         | Healthy Controls                                                               | Strong           | Weak         | Strong      | Moderate | Moderate               | NA                       | Moderate      |
| Winter <i>et al.</i> , 1995 (128)               | Healthy Controls                                                               | Strong           | Weak         | Strong      | Moderate | Strong                 | Strong                   | Moderate      |
| Wright <i>et al.</i> , 1995 (38)                | Healthy Controls                                                               | Strong           | Weak         | Strong      | Moderate | Moderate               | Strong                   | Moderate      |
| De Lugt <i>et al.</i> ,1996 (123)               | Healthy Controls                                                               | Strong           | Weak         | Strong      | Moderate | Strong                 | NA                       | Moderate      |
| Mezzanotte <i>et al.</i> , 1996 (178)           | Obstructive Sleep Apnea<br>Healthy Controls                                    | Strong           | Moderate     | Strong      | Moderate | Moderate               | NA                       | Strong        |
| Braun <i>et al.</i> , 1997 (78)                 | Healthy Controls                                                               | Strong           | Weak         | Moderate    | Moderate | Strong                 | NA                       | Moderate      |
| Burgess <i>et al.</i> , 1997 (97)               | Healthy Controls                                                               | Moderate         | Moderate     | Strong      | Moderate | Moderate               | NA                       | Strong        |
| Casagrande <i>et al.</i> , 1997 (112)           | Healthy Controls                                                               | Strong           | Weak         | Moderate    | Moderate | Moderate               | NA                       | Moderate      |
| Kuboyama <i>et al.</i> , 1997 (144)             | Healthy Controls                                                               | Strong           | Weak         | Moderate    | Moderate | Moderate               | NA                       | Moderate      |
| Lamarche and Ogilvie <i>et al.</i> , 1997 (171) | Psychophysiological Insomniacs<br>Psychiatric Insomniacs<br>Healthy Controls   | Strong           | Moderate     | Strong      | Moderate | Strong                 | NA                       | Strong        |
| Morikawa <i>et al.</i> , 1997 (56)              | Healthy Controls                                                               | Strong           | Weak         | Strong      | Moderate | Strong                 | Strong                   | Moderate      |
| Murphy and Campbell 1997 (86)                   | Healthy Controls                                                               | Strong           | Moderate     | Moderate    | Moderate | Strong                 | NA                       | Strong        |
| Tanaka <i>et al.</i> , 1997 (50)                | Healthy Controls                                                               | Strong           | weak         | Strong      | Moderate | Strong                 | NA                       | Moderate      |
| Trinder <i>et al.</i> , 1997 (150)              | Healthy Controls                                                               | Strong           | Weak         | Strong      | Moderate | Moderate               | NA                       | Moderate      |
| Gora <i>et al.</i> , 1998 (149)                 | Healthy Controls                                                               | Strong           | Moderate     | Strong      | Moderate | Strong                 | NA                       | Strong        |
| Merica <i>et al.</i> , 1998 (65)                | Insomniacs<br>Healthy Control                                                  | Strong           | Moderate     | Moderate    | Moderate | Strong                 | NA                       | Strong        |
| Rittweger and Pöpel, 1998 (159)                 | Healthy Controls                                                               | Strong           | Weak         | Strong      | Moderate | Strong                 | NA                       | Moderate      |
| Rowley <i>et al.</i> , 1998 (161)               | Healthy Controls                                                               | Strong           | Weak         | Moderate    | Moderate | Moderate               | NA                       | Moderate      |
| Shiotsuka <i>et al.</i> , 1998 (81)             | Healthy Controls                                                               | Moderate         | Weak         | Moderate    | Moderate | Strong                 | NA                       | Moderate      |
| Tanaka <i>et al.</i> , 1998 (121)               | Healthy Controls                                                               | Strong           | Weak         | Strong      | Moderate | Strong                 | NA                       | Moderate      |
| Van Den Heuvel <i>et al.</i> , 1998 (88)        | Healthy Controls                                                               | Strong           | Moderate     | Strong      | Moderate | Strong                 | NA                       | Strong        |
| Webster and Colrain, 1998 (135)                 | Healthy Controls                                                               | Strong           | Weak         | Strong      | Moderate | Strong                 | NA                       | Moderate      |
| Worsnop <i>et al.</i> , 1998 (92)               | Healthy Controls                                                               | Strong           | Weak         | Moderate    | Moderate | Strong                 | Strong                   | Moderate      |
| Alloway <i>et al.</i> , 1999 (170)              | Narcolepsy<br>Healthy Controls                                                 | Strong           | Moderate     | Strong      | Moderate | Strong                 | NA                       | Strong        |
| Burgess <i>et al.</i> , 1999 (95)               | Healthy Controls                                                               | Strong           | Weak         | Strong      | Moderate | Strong                 | NA                       | Moderate      |
| Cote and Campbell,1999 (133)                    | Healthy Controls                                                               | Strong           | Weak         | Strong      | Moderate | Strong                 | NA                       | Moderate      |
| Dunai <i>et al.</i> , 1999 (151)                | Healthy Controls                                                               | Strong           | Moderate     | Strong      | Moderate | Strong                 | NA                       | Strong        |
| Gora <i>et al.</i> , 1999 (136)                 | Healthy Controls                                                               | Strong           | Weak         | Strong      | Moderate | Moderate               | NA                       | Moderate      |
| Hiroshige <i>et al.</i> ,1999 (104)             | Healthy Controls                                                               | Strong           | Weak         | Strong      | Moderate | Strong                 | NA                       | Moderate      |
| Shea <i>et al.</i> , 1999 (158)                 | Healthy Controls                                                               | Strong           | Weak         | Strong      | Moderate | Strong                 | Strong                   | Moderate      |
| Tanaka <i>et al.</i> , 1999 (120)               | Healthy Controls                                                               | Strong           | Weak         | Strong      | Moderate | Strong                 | NA                       | Moderate      |
| Colrain <i>et al.</i> , 2000a (124)             | Healthy Controls                                                               | Moderate         | Weak         | Moderate    | Moderate | Strong                 | NA                       | Moderate      |
| Colrain <i>et al.</i> , 2000b (131)             | Healthy Controls                                                               | Strong           | Weak         | Strong      | Moderate | Strong                 | Strong                   | Moderate      |
| De Gennaro <i>et al.</i> , 2000 (103)           | Healthy Controls                                                               | Strong           | Weak         | Strong      | Moderate | Strong                 | NA                       | Moderate      |
| Kräuchi <i>et al.</i> , 2000 (89)               | Healthy Controls                                                               | Strong           | Weak         | Moderate    | Moderate | Strong                 | NA                       | Moderate      |
| Sabri <i>et al.</i> , 2000 (140)                | Healthy Controls                                                               | Strong           | Weak         | Strong      | Moderate | Strong                 | NA                       | Moderate      |
| Spielman <i>et al.</i> , 2000 (83)              | Healthy Controls                                                               | Strong           | Weak         | Strong      | Moderate | Moderate               | NA                       | Moderate      |
| Tanaka <i>et al.</i> , 2000 (51)                | Healthy Controls                                                               | Strong           | Weak         | Strong      | Moderate | Strong                 | NA                       | Moderate      |
| Webster and Colrain, 2000 (138)                 | Healthy Controls                                                               | Strong           | Weak         | Strong      | Moderate | Strong                 | NA                       | Moderate      |
| De Gennaro <i>et al.</i> , 2001a (44)           | Healthy Controls                                                               | strong           | Weak         | Strong      | Moderate | Strong                 | N/A                      | Moderate      |
| De Gennaro <i>et al.</i> , 2001b (45)           | Healthy Controls                                                               | strong           | Weak         | Strong      | Moderate | Strong                 | N/A                      | Moderate      |
| Gora <i>et al.</i> , 2001 (137)                 | Healthy Controls                                                               | Strong           | Moderate     | Strong      | Moderate | Strong                 | NA                       | Strong        |
| Hull and Harsh, 2001 (134)                      | Healthy Controls                                                               | Strong           | Weak         | Strong      | Moderate | Strong                 | NA                       | Moderate      |
| Nittono <i>et al.</i> , 2001 (139)              | Healthy Controls                                                               | Strong           | Weak         | Strong      | Moderate | Strong                 | NA                       | Moderate      |
| Pertlis <i>et al.</i> , 2001 (67)               | Primary Insomnia<br>Insomnia secondary to major depression<br>Healthy Controls | Strong           | Moderate     | Strong      | Moderate | Strong                 | NA                       | Strong        |

Table S3 (continued)

Table S3 (continued)

| Author and year                              | Population studied                                                                                                               | Selection bias | Study design | Confounders | Blinding | Data collection method | Withdrawals and dropouts | Global rating |
|----------------------------------------------|----------------------------------------------------------------------------------------------------------------------------------|----------------|--------------|-------------|----------|------------------------|--------------------------|---------------|
| Cantero <i>et al.</i> , 2002 (160)           | Healthy Controls                                                                                                                 | Strong         | Weak         | Strong      | Moderate | Moderate               | NA                       | Moderate      |
| Cote <i>et al.</i> , 2002 (125)              | Healthy Controls                                                                                                                 | Strong         | Weak         | Strong      | Moderate | Strong                 | NA                       | Moderate      |
| Morikawa <i>et al.</i> , 2002 (60)           | Healthy Controls                                                                                                                 | Strong         | Weak         | Strong      | Moderate | Strong                 | NA                       | Moderate      |
| Peszka and Harsh 2002 (130)                  | Healthy Controls                                                                                                                 | Strong         | Weak         | Strong      | Moderate | Strong                 | Strong                   | Moderate      |
| Carrington <i>et al.</i> , 2003 (98)         | Healthy Controls                                                                                                                 | Strong         | Moderate     | Strong      | Moderate | Strong                 | NA                       | Strong        |
| Staner <i>et al.</i> , 2003 (68)             | Primary Insomniacs<br>Depressive Insomniacs<br>Healthy Controls                                                                  | Strong         | Moderate     | Strong      | Moderate | Strong                 | NA                       | Strong        |
| De Gennaro <i>et al.</i> , 2004 (54)         | Healthy Controls                                                                                                                 | Strong         | Weak         | Strong      | Moderate | Strong                 | NA                       | Moderate      |
| Porte <i>et al.</i> , 2004 (105)             | Healthy Controls                                                                                                                 | Strong         | Weak         | Strong      | Moderate | Strong                 | NA                       | Moderate      |
| Bódizs <i>et al.</i> , 2005 (106)            | Individuals with epilepsy                                                                                                        | Strong         | Weak         | Moderate    | Moderate | Moderate               | NA                       | Moderate      |
| Carrington <i>et al.</i> , 2005 (153)        | Healthy Controls                                                                                                                 | Strong         | Weak         | Moderate    | Moderate | Moderate               | NA                       | Moderate      |
| De Gennaro <i>et al.</i> , 2005 (55)         | Healthy Controls                                                                                                                 | Strong         | Weak         | Strong      | Moderate | Strong                 | NA                       | Moderate      |
| Fogel <i>et al.</i> , 2005 (179)             | Obstructive Sleep Apnea<br>Healthy Controls                                                                                      | Strong         | Moderate     | Strong      | Moderate | Strong                 | Strong                   | Strong        |
| Kotajima <i>et al.</i> , 2005 (143)          | Healthy Controls                                                                                                                 | Moderate       | Weak         | Strong      | Moderate | Moderate               | Strong                   | Moderate      |
| Tamaki <i>et al.</i> , 2005 (122)            | Healthy Controls                                                                                                                 | Strong         | Moderate     | Strong      | Moderate | Strong                 | NA                       | Strong        |
| Shinar <i>et al.</i> , 2006 (96)             | Obstructive Sleep Apnea<br>Various Sleep Disorders<br>Healthy Controls                                                           | Strong         | Moderate     | Moderate    | Moderate | Strong                 | NA                       | Strong        |
| Moul <i>et al.</i> , 2007 (63)               | Primary Insomnia<br>Healthy Controls                                                                                             | Strong         | Moderate     | Strong      | Moderate | Strong                 | NA                       | Strong        |
| Casagrande and Bertini 2008 (167)            | Healthy Controls                                                                                                                 | Strong         | Weak         | Strong      | Moderate | Strong                 | NA                       | Moderate      |
| Ferri <i>et al.</i> , 2008 (62)              | Healthy Controls                                                                                                                 | Strong         | Weak         | Strong      | Moderate | Strong                 | NA                       | Moderate      |
| Okamoto-Mizuno, 2008 (154)                   | Healthy Controls                                                                                                                 | Strong         | Weak         | Strong      | Moderate | Strong                 | NA                       | Moderate      |
| Wilkinson <i>et al.</i> , 2008 (156)         | Healthy Controls                                                                                                                 | Strong         | Weak         | Strong      | Moderate | Strong                 | NA                       | Moderate      |
| Fabbri <i>et al.</i> , 2009 (181)            | Obstructive Sleep Apnea<br>Healthy Controls                                                                                      | Strong         | Moderate     | Strong      | Moderate | Moderate               | NA                       | Strong        |
| Kim <i>et al.</i> , 2009 (72)                | Narcolepsy<br>Healthy Controls                                                                                                   | Strong         | Moderate     | Strong      | Moderate | Strong                 | NA                       | Strong        |
| Fabbri <i>et al.</i> , 2010 (180)            | Obstructive Sleep Apnea                                                                                                          | Strong         | Weak         | Strong      | Moderate | Strong                 | NA                       | Moderate      |
| Magnin <i>et al.</i> , 2010 (74)             | Individuals with refractory<br>temporal lobe epilepsy                                                                            | Moderate       | Weak         | Moderate    | Moderate | Strong                 | NA                       | Moderate      |
| Stadler <i>et al.</i> , 2010 (177)           | Obstructive Sleep Apnea<br>Healthy Controls                                                                                      | Strong         | Moderate     | Strong      | Moderate | Strong                 | Strong                   | Strong        |
| Yasuda <i>et al.</i> , 2010 (129)            | Healthy Controls                                                                                                                 | Strong         | Weak         | Strong      | Moderate | Strong                 | NA                       | Moderate      |
| De Zambotti <i>et al.</i> , 2011 (175)       | Primary Insomnia<br>Healthy Controls                                                                                             | Strong         | Moderate     | Strong      | Moderate | Strong                 | NA                       | Strong        |
| Kertesz and Cote, 2011 (172)                 | Primary Insomnia<br>Healthy Controls                                                                                             | Strong         | Moderate     | Strong      | Moderate | Strong                 | Moderate                 | Strong        |
| Näsi <i>et al.</i> , 2011 (80)               | Healthy Controls                                                                                                                 | Strong         | Weak         | Strong      | Moderate | Strong                 | NA                       | Moderate      |
| Pizza <i>et al.</i> , 2011 (99)              | Healthy Controls                                                                                                                 | Strong         | Weak         | Strong      | Moderate | Strong                 | NA                       | Moderate      |
| Pizza <i>et al.</i> , 2011 (73)              | Narcolepsy<br>Idiopathic Hypersomnia                                                                                             | Strong         | Moderate     | Strong      | Moderate | Strong                 | NA                       | Strong        |
| Corsi-Cabrera <i>et al.</i> , 2012 (70)      | Primary Insomnia<br>Healthy Controls                                                                                             | Strong         | Moderate     | Strong      | Strong   | Strong                 | NA                       | Strong        |
| Nicholas <i>et al.</i> , 2012 (157)          | Healthy Controls                                                                                                                 | Strong         | Weak         | Strong      | Moderate | Strong                 | NA                       | Moderate      |
| Drakatos <i>et al.</i> , 2013 (168)          | Narcolepsy<br>Idiopathic Hypersomnia<br>Behaviourally Induced<br>Inadequate Sleep Syndrome<br>Periodic Limb Movement<br>Disorder | Strong         | Moderate     | Strong      | Moderate | Moderate               | NA                       | Strong        |
| Hwang <i>et al.</i> , 2013 (152)             | Healthy Controls                                                                                                                 | Strong         | Weak         | Strong      | Moderate | Strong                 | NA                       | Moderate      |
| Marzano <i>et al.</i> , 2013 (47)            | Healthy Controls                                                                                                                 | Strong         | Weak         | Strong      | Moderate | Strong                 | NA                       | Moderate      |
| Bareham <i>et al.</i> , 2014 (107)           | Healthy Controls                                                                                                                 | Strong         | Weak         | Strong      | Moderate | Strong                 | NA                       | Moderate      |
| Cervena <i>et al.</i> , 2014 (69)            | Primary Insomnia<br>Secondary Insomnia<br>Healthy Controls                                                                       | Strong         | Moderate     | Strong      | Moderate | Strong                 | NA                       | Strong        |
| Ferri <i>et al.</i> , 2014 (71)              | Restless Legs Syndrome<br>Primary Insomnia<br>Healthy Controls                                                                   | Strong         | Moderate     | Strong      | Moderate | Strong                 | NA                       | Strong        |
| Prerau <i>et al.</i> , 2014 (166)            | Healthy Controls                                                                                                                 | Strong         | Weak         | Strong      | Moderate | Strong                 | NA                       | Moderate      |
| Sarasso <i>et al.</i> , 2014 (141)           | Individuals with suspected<br>diagnosis of drug-resistant<br>extra-temporal focal<br>epilepsy                                    | Moderate       | Weak         | Moderate    | Moderate | Strong                 | NA                       | Moderate      |
| Siclari <i>et al.</i> , 2014 (49)            | Healthy<br>Controls                                                                                                              | Strong         | Weak         | Strong      | Moderate | Moderate               | NA                       | Moderate      |
| Park <i>et al.</i> , 2015 (48)               | Healthy<br>Controls                                                                                                              | Strong         | Weak         | Strong      | Moderate | Strong                 | NA                       | Moderate      |
| Zhang and Khatami, 2015 (82)                 | Healthy Controls                                                                                                                 | Strong         | Weak         | Strong      | Moderate | Moderate               | Strong                   | Moderate      |
| Hale <i>et al.</i> , 2016 (76)               | Healthy Controls                                                                                                                 | Strong         | Weak         | Strong      | Moderate | Strong                 | Strong                   | Moderate      |
| Kawai <i>et al.</i> , 2016 (119)             | Healthy Controls                                                                                                                 | Moderate       | Weak         | Moderate    | Moderate | Strong                 | NA                       | Moderate      |
| Bagshaw <i>et al.</i> , 2017 (77)            | Healthy Controls and<br>individuals with idiopathic<br>generalised epilepsy (IGE)                                                | Strong         | Weak         | Strong      | Moderate | Strong                 | NA                       | Moderate      |
| Ioannides <i>et al.</i> , 2017 (75)          | Healthy Controls                                                                                                                 | Moderate       | Weak         | Strong      | Moderate | Strong                 | NA                       | Moderate      |
| Vecchio <i>et al.</i> , 2017 (61)            | Healthy Controls                                                                                                                 | Strong         | Weak         | Strong      | Moderate | Strong                 | NA                       | Moderate      |
| Fernandez Guerrero and Achermann., 2018 (57) | Healthy Controls                                                                                                                 | Strong         | Moderate     | Strong      | Moderate | Strong                 | NA                       | Strong        |
| Scott <i>et al.</i> , 2018 (163)             | Healthy Controls                                                                                                                 | Strong         | Weak         | Strong      | Moderate | Weak                   | NA                       | Weak          |
| Achermann <i>et al.</i> , 2019 (58)          | Healthy Controls                                                                                                                 | Strong         | Weak         | Strong      | Moderate | Moderate               | NA                       | Moderate      |
| Fernandez Guerrero and Achermann., 2019 (53) | Healthy Controls                                                                                                                 | Strong         | Moderate     | Strong      | Moderate | Strong                 | NA                       | Strong        |
| Gorgoni <i>et al.</i> , 2019 (117)           | Healthy Controls                                                                                                                 | Strong         | Moderate     | Strong      | Moderate | Strong                 | NA                       | Strong        |
| Tsai <i>et al.</i> , 2019 (176)              | Primary Insomnia<br>Healthy Controls                                                                                             | Strong         | Moderate     | Strong      | Moderate | Strong                 | NA                       | Strong        |
| Nano <i>et al.</i> , 2020 (155)              | Healthy Controls                                                                                                                 | Strong         | Weak         | Strong      | Moderate | Strong                 | NA                       | Moderate      |
| Gorgoni <i>et al.</i> , 2021 (118)           | Healthy Controls                                                                                                                 | Strong         | Weak         | Strong      | Moderate | Moderate               | Strong                   | Moderate      |
| Scott <i>et al.</i> , 2021 (164)             | Healthy Controls                                                                                                                 | Strong         | Weak         | Strong      | Moderate | Weak                   | Strong                   | Weak          |
| Partonen <i>et al.</i> , 2022 (90)           | Healthy Controls                                                                                                                 | Strong         | Weak         | Moderate    | Moderate | Moderate               | NA                       | Moderate      |
| Strauss <i>et al.</i> , 2022 (113)           | Healthy Controls                                                                                                                 | Strong         | Weak         | Strong      | Moderate | Strong                 | Strong                   | Moderate      |

## References

117. Gorgoni M, Bartolacci C, D'Atri A, et al. The Spatiotemporal Pattern of the Human Electroencephalogram at Sleep Onset After a Period of Prolonged Wakefulness. *Front Neurosci* 2019;13:312.
118. Gorgoni M, Scarpelli S, Annarumma L, et al. The Regional EEG Pattern of the Sleep Onset Process in Older Adults. *Brain Sci* 2021;11:1261.
119. Kawai M, Beaudreau SA, Gould CE, et al. Delta Activity at Sleep Onset and Cognitive Performance in Community-Dwelling Older Adults. *Sleep* 2016;39:907-14.
120. Tanaka H, Hayashi M, Hori T. Topographic mapping of EEG spectral power and coherence in delta activity during the transition from wakefulness to sleep. *Psychiatry Clin Neurosci* 1999;53:155-7.
121. Tanaka H, Hayashi M, Hori T. Topographic mapping of electroencephalography coherence in hypnagogic state. *Psychiatry Clin Neurosci* 1998;52:147-8.
122. Tamaki M, Nittono H, Hayashi M, et al. Examination of the first-night effect during the sleep-onset period. *Sleep* 2005;28:195-202.
123. de Lugt DR, Loewy DH, Campbell KB. The effect of sleep onset on event related potentials with rapid rates of stimulus presentation. *Electroencephalogr Clin Neurophysiol* 1996;98:484-92.
124. Colrain IM, Di Parsia P, Gora J. The impact of prestimulus EEG frequency on auditory evoked potentials during sleep onset. *Can J Exp Psychol* 2000;54:243-54.
125. Cote KA, De Lugt DR, Campbell KB. Changes in the scalp topography of event-related potentials and behavioral responses during the sleep onset period. *Psychophysiology* 2002;39:29-37.
126. Harsh J, Voss U, Hull J, et al. ERP and behavioral changes during the wake/sleep transition. *Psychophysiology* 1994;31:244-52.
127. Nielsen-Bohlman L, Knight RT, Woods DL, et al. Differential auditory processing continues during sleep. *Electroencephalogr Clin Neurophysiol* 1991;79:281-90.
128. Winter O, Kok A, Kenemans JL, et al. Auditory event-related potentials to deviant stimuli during drowsiness and stage 2 sleep. *Electroencephalogr Clin Neurophysiol* 1995;96:398-412.
129. Yasuda K, Ray LB, Cote KA. Anticipatory attention during the sleep onset period. *Conscious Cogn* 2011;20:912-9.
130. Peszka J, Harsh J. Effect of sleep deprivation on NREM sleep ERPs and related activity at sleep onset. *Int J Psychophysiol* 2002;46:275-86.
131. Colrain IM, Webster KE, Hirst G, et al. The roles of vertex sharp waves and K-complexes in the generation of N300 in auditory and respiratory-related evoked potentials during early stage 2 NREM sleep. *Sleep* 2000;23:97-106.
132. Bastuji H, García-Larrea L, Franc C, et al. Brain processing of stimulus deviance during slow-wave and paradoxical sleep: a study of human auditory evoked responses using the oddball paradigm. *J Clin Neurophysiol* 1995;12:155-67.
133. Cote KA, Campbell KB. P300 to high intensity stimuli during REM sleep. *Clin Neurophysiol* 1999;110:1345-50.
134. Hull J, Harsh J. P300 and sleep-related positive waveforms (P220, P450, and P900) have different determinants. *J Sleep Res* 2001;10:9-17.
135. Webster KE, Colrain IM. Multichannel EEG analysis of respiratory evoked-potential components during wakefulness and NREM sleep. *J Appl Physiol* (1985) 1998;85:1727-35.
136. Gora J, Colrain IM, Trinder J. Respiratory-related evoked potentials during the transition from alpha to theta EEG activity in stage 1 NREM sleep. *J Sleep Res* 1999;8:123-34.
137. Gora J, Colrain IM, Trinder J. The investigation of K-complex and vertex sharp wave activity in response to mid-inspiratory occlusions and complete obstructions to breathing during NREM sleep. *Sleep* 2001;24:81-9.
138. Webster KE, Colrain IM. The respiratory-related evoked potential: effects of attention and occlusion duration. *Psychophysiology* 2000;37:310-8.
139. Nittono H, Momose D, Hori T. The vanishing point of the mismatch negativity at sleep onset. *Clin Neurophysiol* 2001;112:732-9.
140. Sabri M, De Lugt DR, Campbell KB. The mismatch negativity to frequency deviants during the transition from wakefulness to sleep. *Can J Exp Psychol* 2000;54:230-42.
141. Sarasso S, Proserpio P, Pigorini A, et al. Hippocampal sleep spindles preceding neocortical sleep onset in humans. *Neuroimage* 2014;86:425-32.
142. Klingelhöfer J, Hajak G, Matzander G, et al. Dynamics of cerebral blood flow velocities during normal human sleep. *Clin Neurol Neurosurg* 1995;97:142-8.
143. Kotajima F, Meadows GE, Morrell MJ, et al. Cerebral blood flow changes associated with fluctuations in alpha and theta rhythm during sleep onset in humans. *J Physiol* 2005;568:305-13.
144. Kuboyama T, Hori A, Sato T, et al. Changes in cerebral blood flow velocity in healthy young men during overnight sleep and while awake. *Electroencephalogr Clin Neurophysiol* 1997;102:125-31.

145. Hajak G, Klingelhöfer J, Schulz-Varzegi M, et al. Relationship between cerebral blood flow velocities and cerebral electrical activity in sleep. *Sleep* 1994;17:11-9.
146. Sakai F, Meyer JS, Karacan I, et al. Normal human sleep: regional cerebral hemodynamics. *Ann Neurol* 1980;7:471-8.
147. Colrain IM, Trinder J, Fraser G, et al. Ventilation during sleep onset. *J Appl Physiol* (1985) 1987;63:2067-74.
148. Trinder J, Whitworth F, Kay A, et al. Respiratory instability during sleep onset. *J Appl Physiol* (1985) 1992;73:2462-9.
149. Gora J, Kay A, Colrain IM, et al. Load compensation as a function of state during sleep onset. *J Appl Physiol* (1985) 1998;84:2123-31.
150. Trinder J, Van Beveren JA, Smith P, et al. Correlation between ventilation and EEG-defined arousal during sleep onset in young subjects. *J Appl Physiol* (1985) 1997;83:2005-11.
151. Dunai J, Kleiman J, Trinder J. Ventilatory instability during sleep onset in individuals with high peripheral chemosensitivity. *J Appl Physiol* (1985) 1999;87:661-72.
152. Jung DW, Hwang SH, Chung GS, et al. Estimation of sleep onset latency based on the blood pressure regulatory reflex mechanism. *IEEE J Biomed Health Inform* 2013;17:534-44.
153. Carrington MJ, Barbieri R, Colrain IM, et al. Changes in cardiovascular function during the sleep onset period in young adults. *J Appl Physiol* (1985) 2005;98:468-76.
154. Okamoto-Mizuno K, Yamashiro Y, Tanaka H, et al. Heart rate variability and body temperature during the sleep onset period. *Sleep and Biological Rhythms*. 2008;6:42-9.
155. Nano M, Fonseca P, Overeem S, et al. Lying Awake at Night: Cardiac Autonomic Activity in Relation to Sleep Onset and Maintenance. *Front Neurosci* 2019;13:1405.
156. Wilkinson V, Malhotra A, Nicholas CL, et al. Discharge patterns of human genioglossus motor units during sleep onset. *Sleep* 2008;31:525-33.
157. Nicholas CL, Jordan AS, Heckel L, et al. Discharge patterns of human tensor palatini motor units during sleep onset. *Sleep* 2012;35:699-707.
158. Shea SA, Edwards JK, White DP. Effect of wake-sleep transitions and rapid eye movement sleep on pharyngeal muscle response to negative pressure in humans. *J Physiol* 1999;520 Pt 3:897-908.
159. Rittweger J, Pöpel A. Respiratory-like periodicities in slow eye movements during sleep onset. *Clin Physiol* 1998;18:471-8.
160. Cantero JL, Atienza M, Stickgold R, et al. Nightcap: a reliable system for determining sleep onset latency. *Sleep* 2002;25:238-45.
161. Rowley JT, Stickgold R, Hobson JA. Eyelid movements and mental activity at sleep onset. *Conscious Cogn* 1998;7:67-84.
162. Gillberg M, Akerstedt T. Body temperature and sleep at different times of day. *Sleep* 1982;5:378-88.
163. Scott H, Lack L, Lovato N. A pilot study of a novel smartphone application for the estimation of sleep onset. *J Sleep Res* 2018;27:90-7.
164. Scott H, Whitelaw A, Canty A, et al. The accuracy of the THIM wearable device for estimating sleep onset latency. *J Clin Sleep Med* 2021;17:973-81.
165. Casagrande M, Violani C, De Gennaro L, et al. Which hemisphere falls asleep first? *Neuropsychologia* 1995;33:815-22.
166. Prerau MJ, Hartnack KE, Obregon-Henao G, et al. Tracking the sleep onset process: an empirical model of behavioral and physiological dynamics. *PLoS Comput Biol* 2014;10:e1003866.
167. Casagrande M, Bertini M. Laterality of the sleep onset process: which hemisphere goes to sleep first? *Biol Psychol* 2008;77:76-80.
168. Drakatos P, Suri A, Higgins SE, et al. Sleep stage sequence analysis of sleep onset REM periods in the hypersomnias. *J Neurol Neurosurg Psychiatry* 2013;84:223-7.
169. Hauri P, Olmstead E. What is the moment of sleep onset for insomniacs? *Sleep* 1983;6:10-5.
170. Alloway CE, Ogilvie RD, Shapiro CM. EEG spectral analysis of the sleep-onset period in narcoleptics and normal sleepers. *Sleep* 1999;22:191-203.
171. Lamarche CH, Ogilvie RD. Electrophysiological changes during the sleep onset period of psychophysiological insomniacs, psychiatric insomniacs, and normal sleepers. *Sleep* 1997;20:724-33.
172. Kertesz RS, Cote KA. Event-related potentials during the transition to sleep for individuals with sleep-onset insomnia. *Behav Sleep Med* 2011;9:68-85.
173. Meyer JS, Ishikawa Y, Hata T, et al. Cerebral blood flow in normal and abnormal sleep and dreaming. *Brain Cogn* 1987;6:266-94.
174. Freedman RR, Sattler HL. Physiological and psychological factors in sleep-onset insomnia. *J Abnorm Psychol* 1982;91:380-9.
175. de Zambotti M, Covassin N, De Min Tona G, et al. Sleep onset and cardiovascular activity in primary insomnia. *J Sleep Res* 2011;20:318-25.
176. Tsai HJ, Kuo TBJ, Kuo KL, et al. Failure to de-arouse

- during sleep-onset transitions in the heart rates of individuals with sleep-onset insomnia. *J Psychosom Res* 2019;126:109809.
177. Stadler DL, McEvoy RD, Bradley J, et al. Changes in lung volume and diaphragm muscle activity at sleep onset in obese obstructive sleep apnea patients vs. healthy-weight controls. *J Appl Physiol* (1985) 2010;109:1027-36.
  178. Mezzanotte WS, Tangel DJ, White DP. Influence of sleep onset on upper-airway muscle activity in apnea patients versus normal controls. *Am J Respir Crit Care Med* 1996;153:1880-7.
  179. Fogel RB, Trinder J, White DP, et al. The effect of sleep onset on upper airway muscle activity in patients with sleep apnoea versus controls. *J Physiol* 2005;564:549-62.
  180. Fabbri M, Pizza F, Magosso E, et al. Automatic slow eye movement (SEM) detection of sleep onset in patients with obstructive sleep apnea syndrome (OSAS): comparison between multiple sleep latency test (MSLT) and maintenance of wakefulness test (MWT). *Sleep Med* 2010;11:253-7.
  181. Fabbri M, Provini F, Magosso E, et al. Detection of sleep onset by analysis of slow eye movements: a preliminary study of MSLT recordings. *Sleep Med* 2009;10:637-40.
  182. Morris M, Lack L, Dawson D. Sleep-onset insomniacs have delayed temperature rhythms. *Sleep* 1990;13:1-14.
  183. Franklin J. The measurement of sleep onset latency in insomnia. *Behav Res Ther* 1981;19:547-9.
